# Supplementary material for: Imidazolium salt-supported Mukaiyama reagent: an efficient condensation reagent for amide bond formation
Source: Royal Society of Chemistry journal article supplement (doi:10.1039/c4ra14856h), 2015-01-01

## Supporting Information

### Imidazolium Salt-supported Mukaiyama Reagent: An Efficient Condensation Reagent for Amide Bond Formation

Khima Pandey, Sunita Choudhary, Manoj Kumar Muthyala and Anil Kumar\*

*Department of Chemistry, Birla Institute of Technology and Science, Pilani, 333031, India*

E-mail: [anilkumar@pilani.bits-pilani.ac.in](mailto:anilkumar@pilani.bits-pilani.ac.in)

Copies of  $^1\text{H}$  NMR and  $^{13}\text{C}$  NMR spectra of **13**, **14**, **15**, **18a-p**, **20**

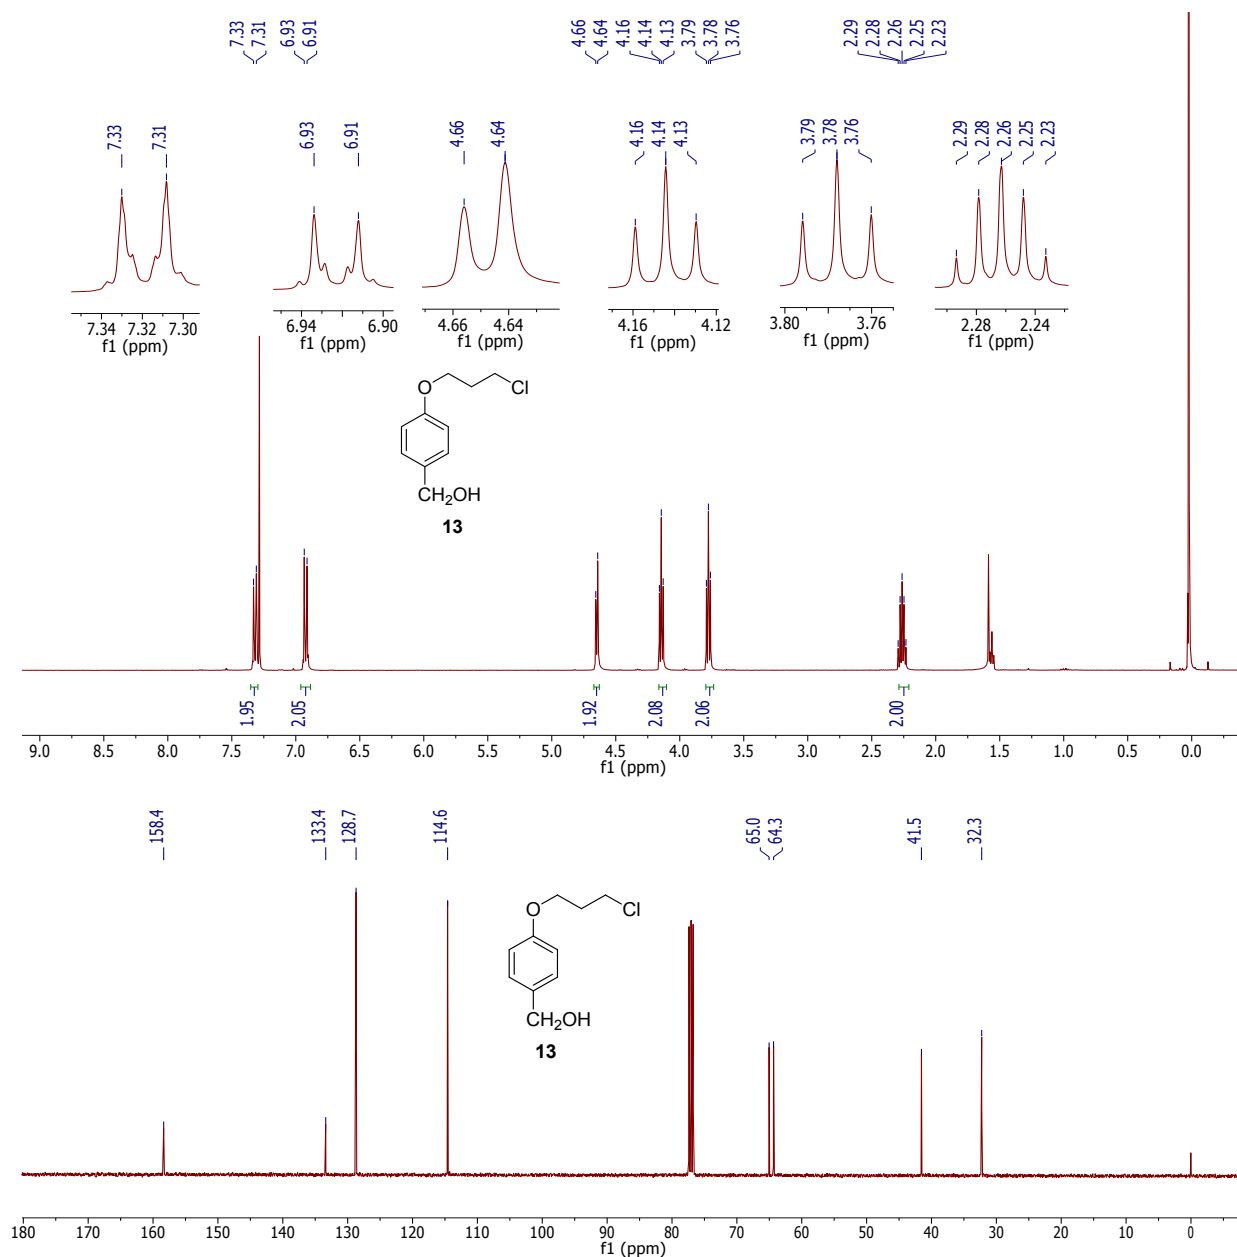

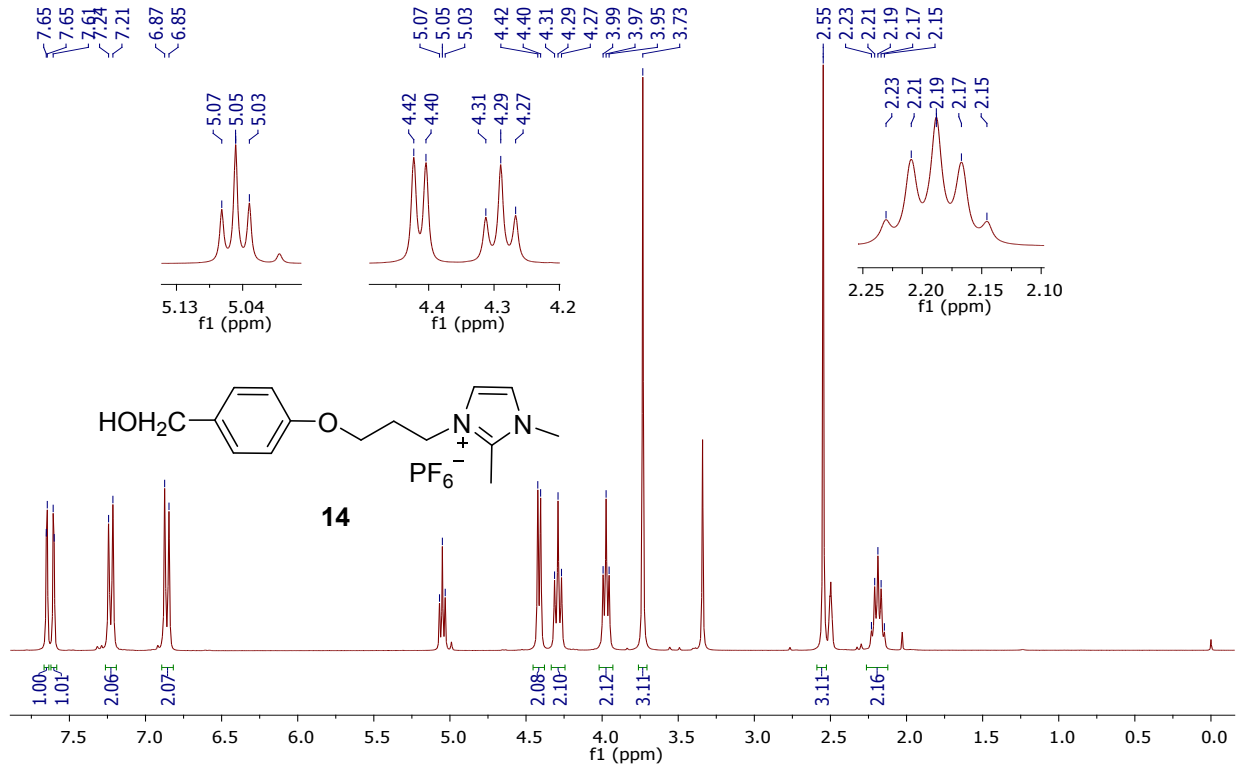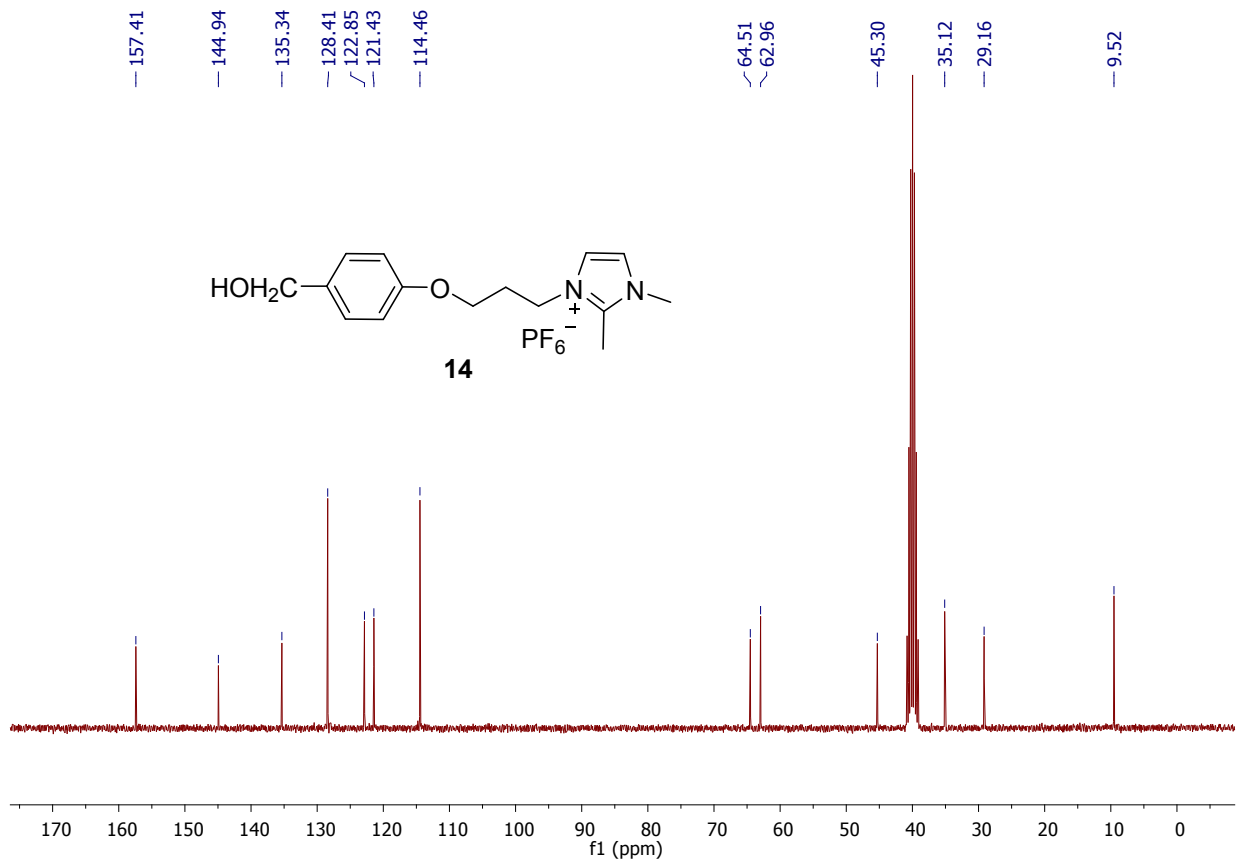

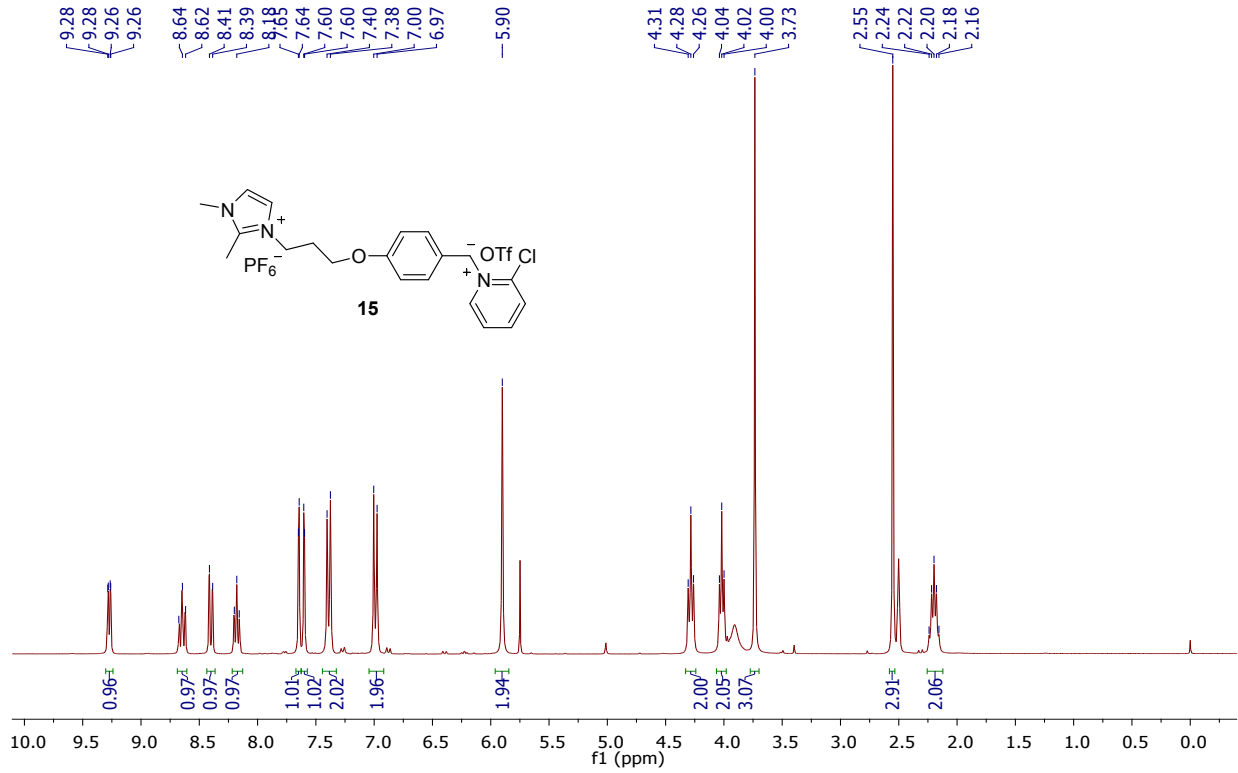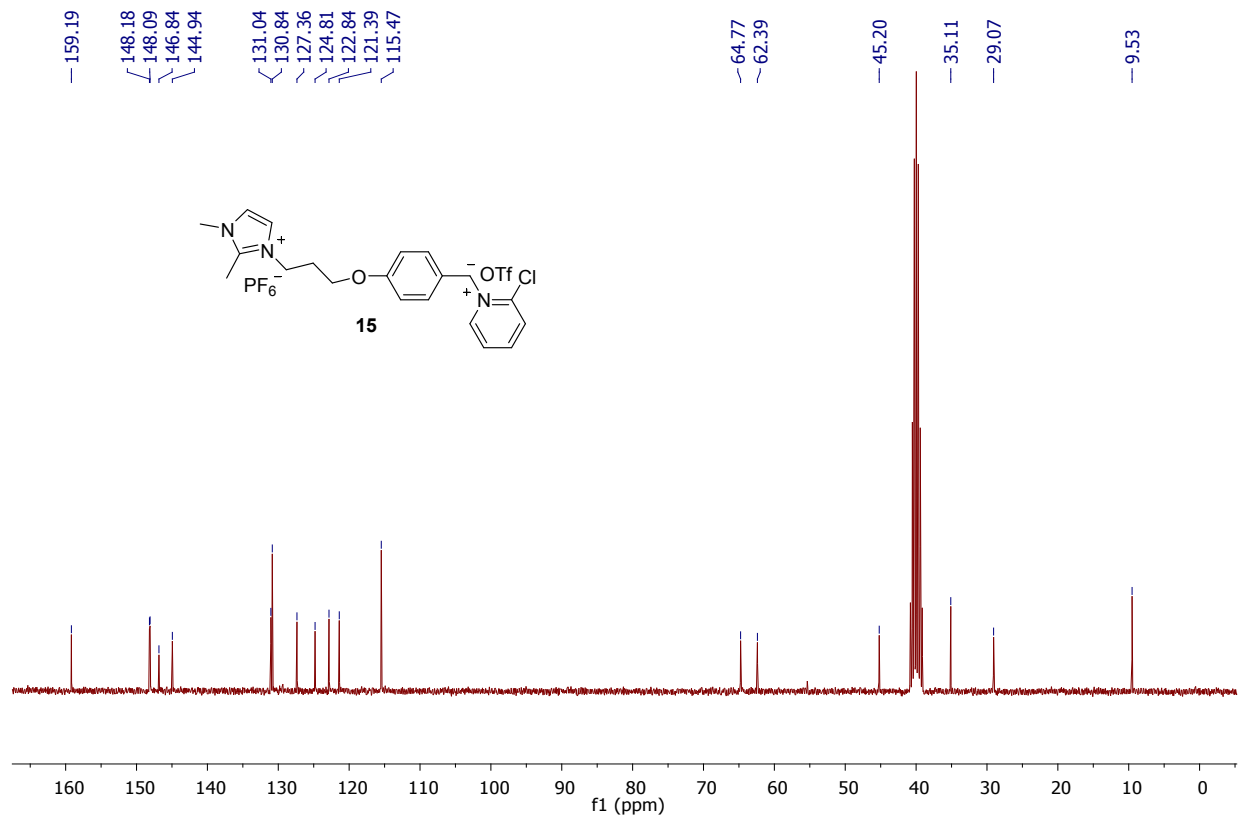

7.91  
7.89  
7.84  
7.68  
7.66  
7.60  
7.59  
7.57  
7.54  
7.52  
7.50  
7.43  
7.41  
7.39  
7.20  
7.19  
7.17

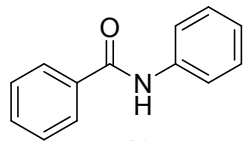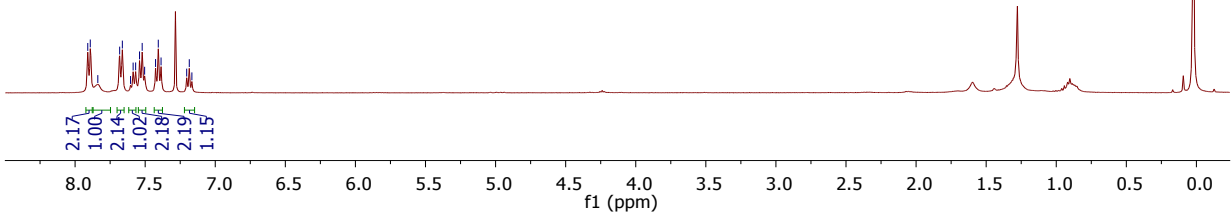

165.75

137.92  
135.02  
131.89  
129.14  
128.84  
127.03  
124.62  
120.20

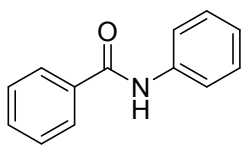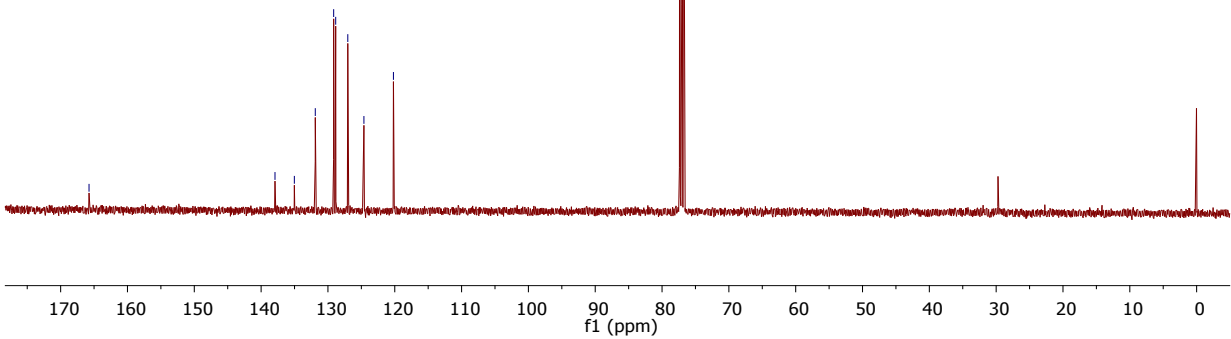

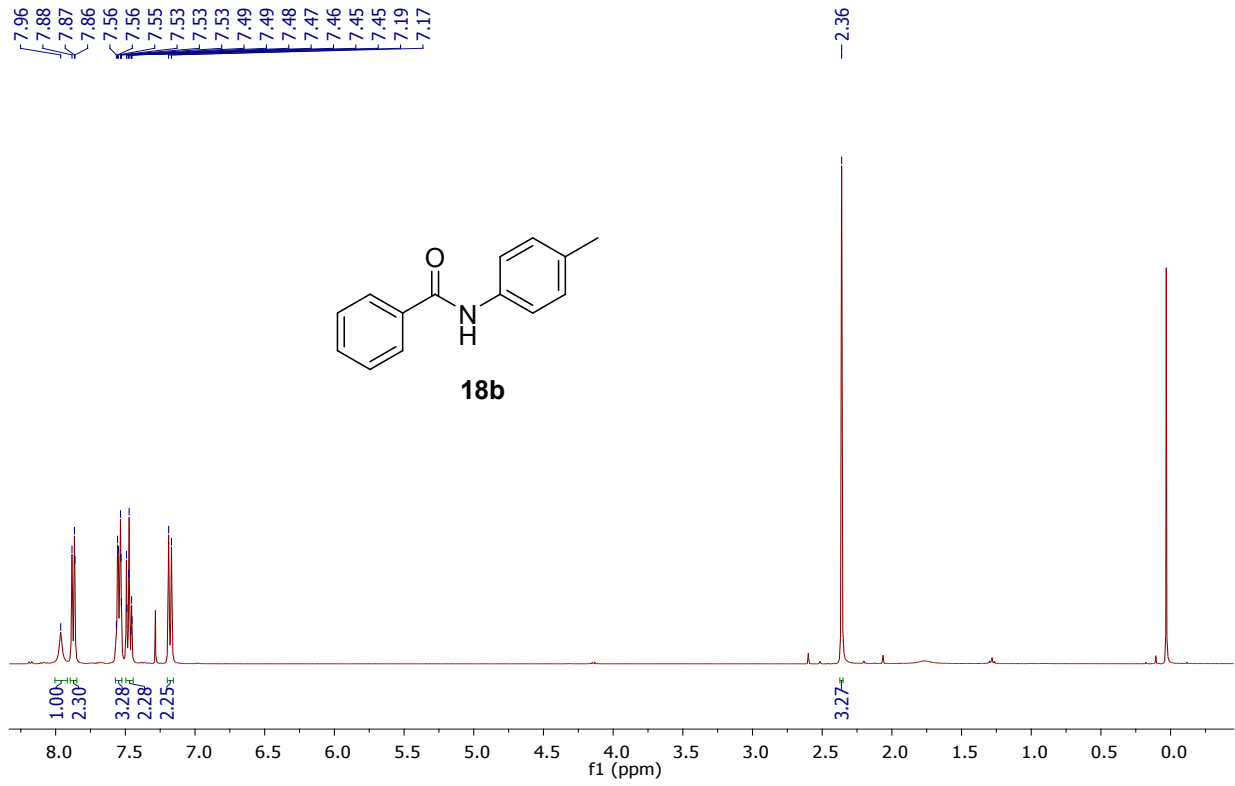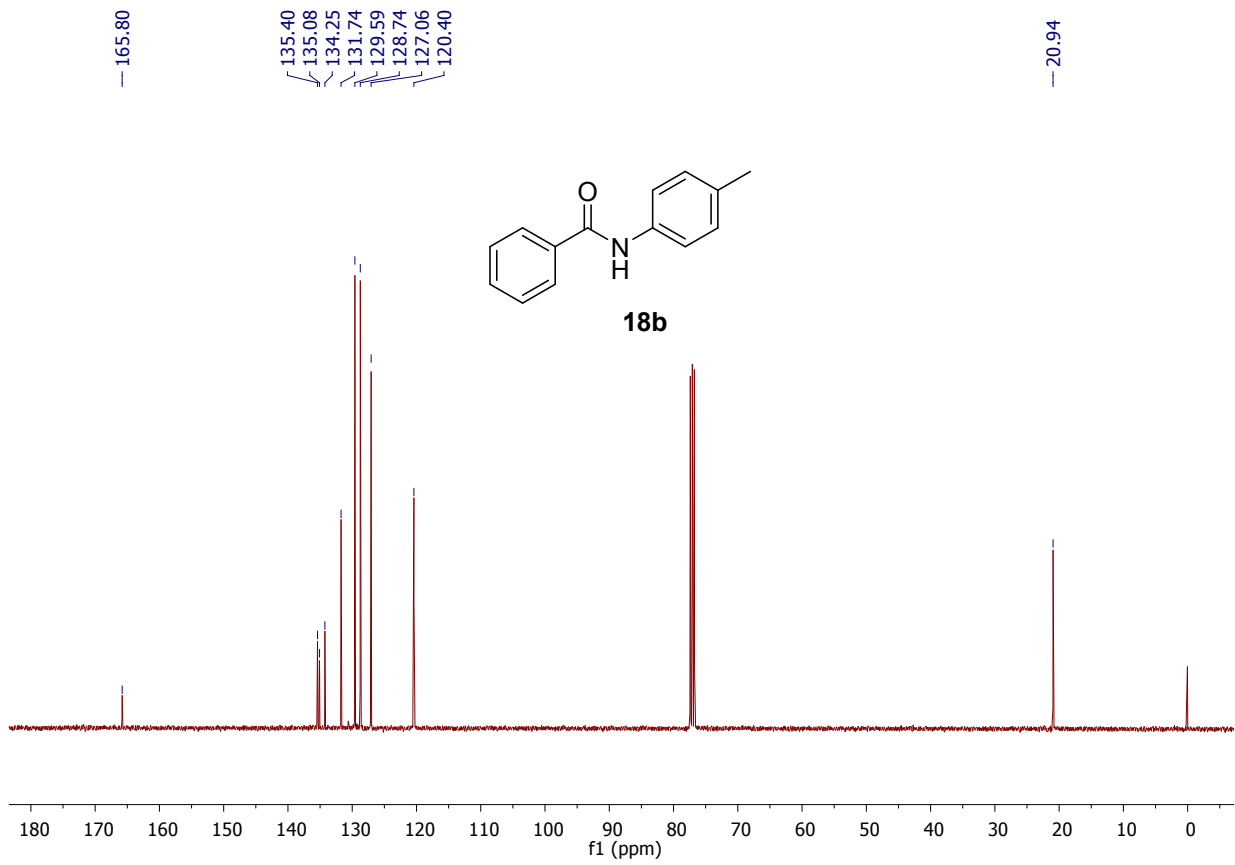

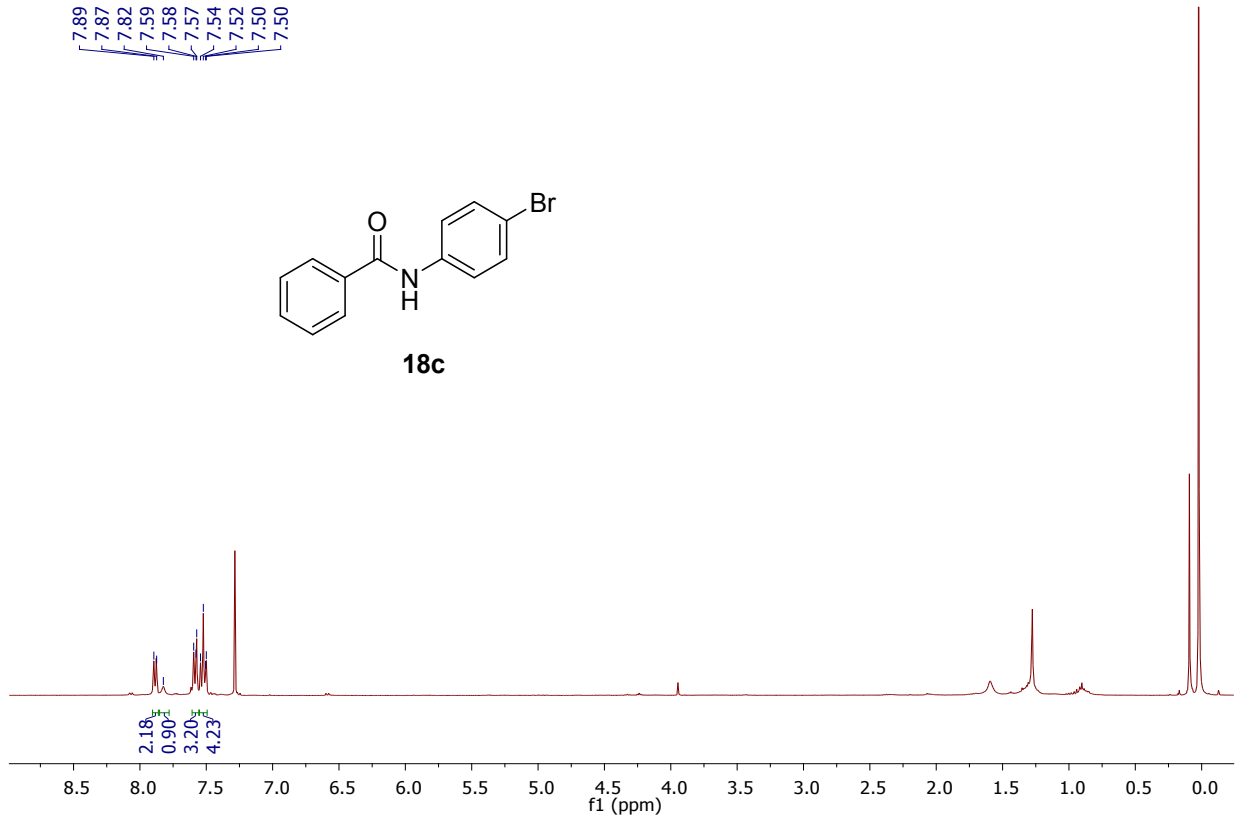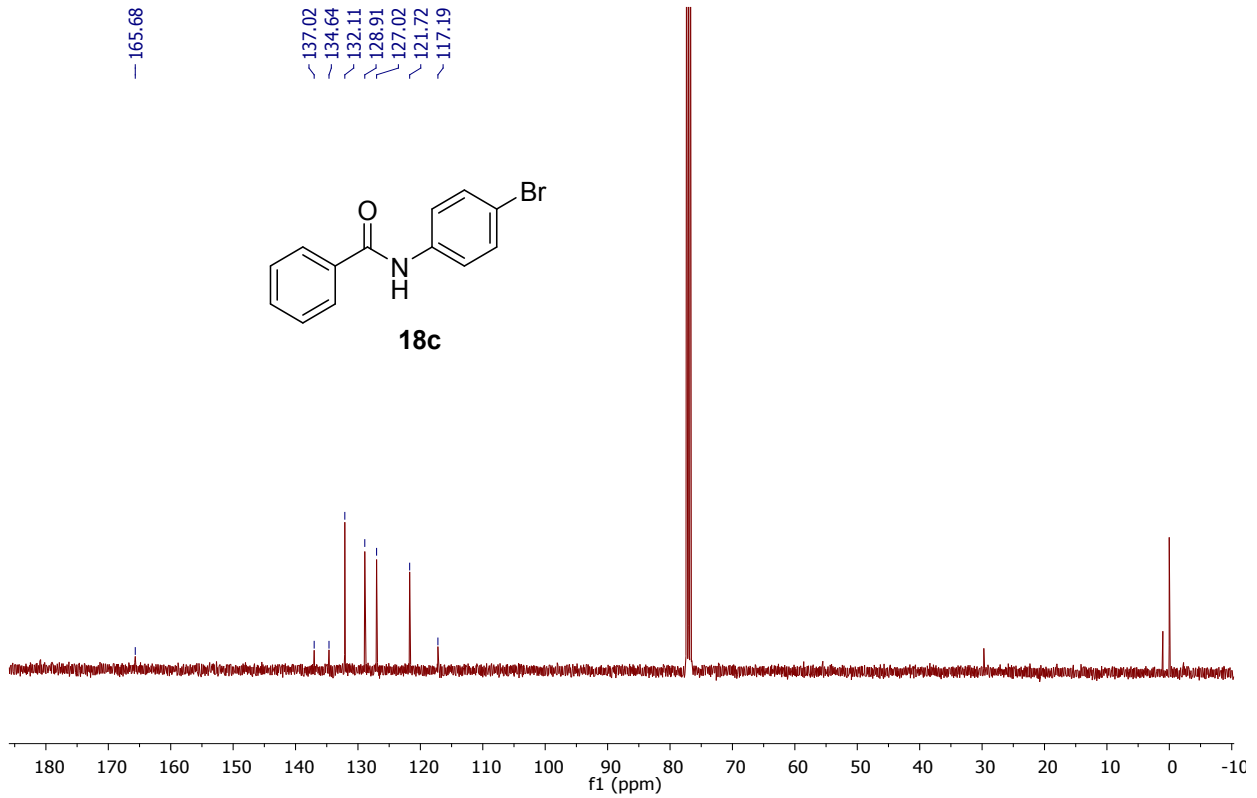

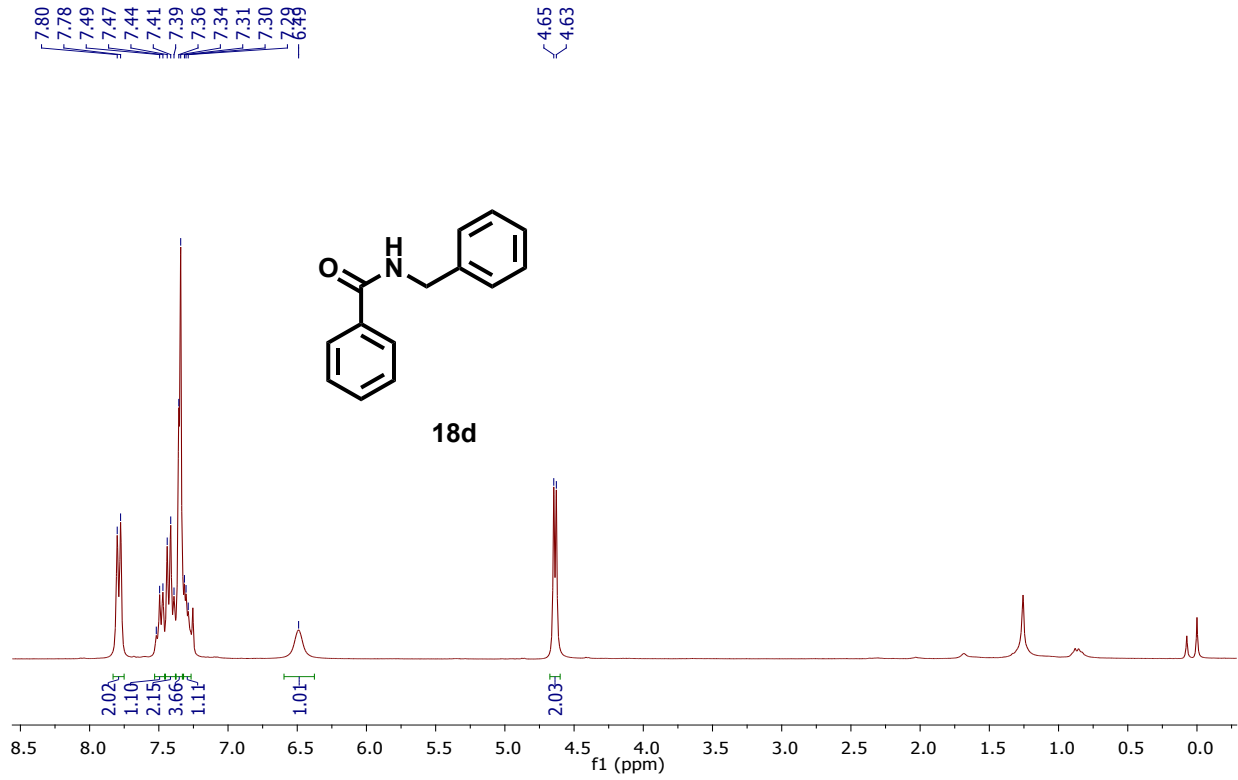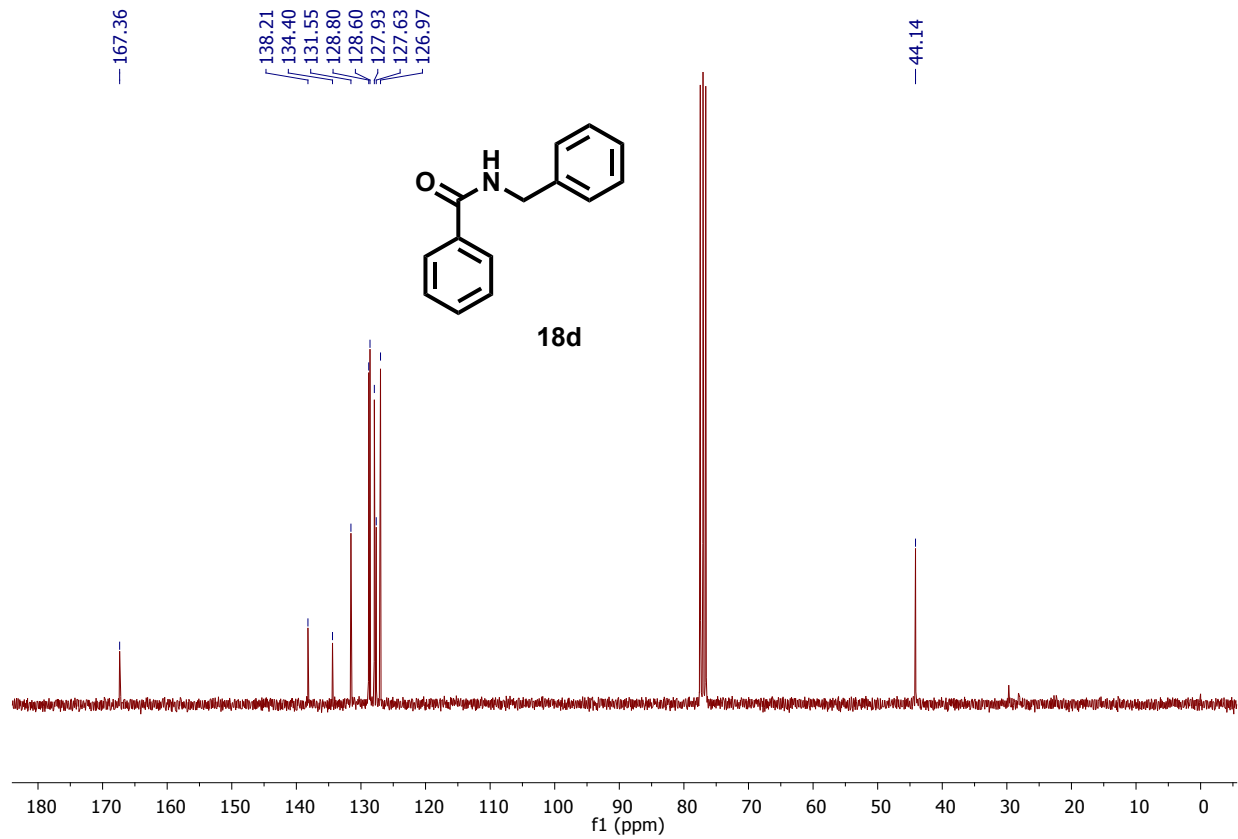

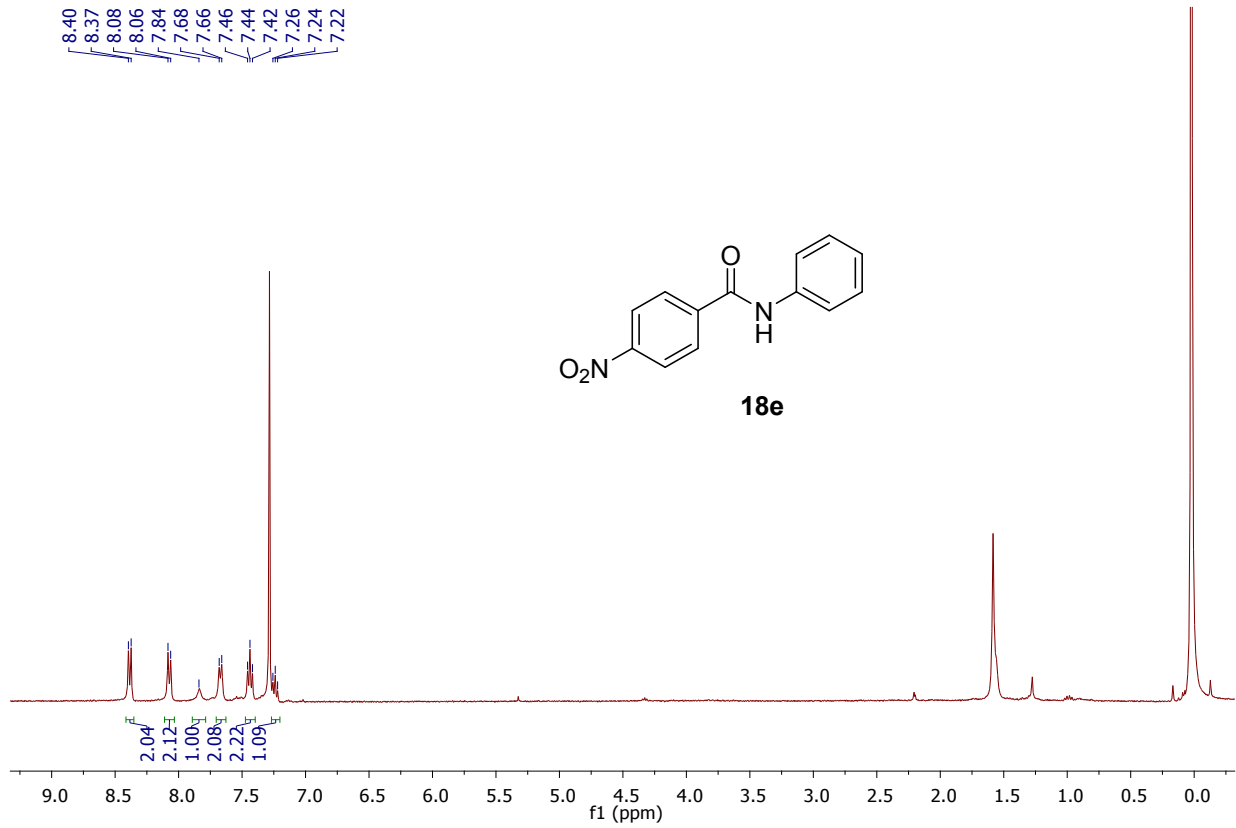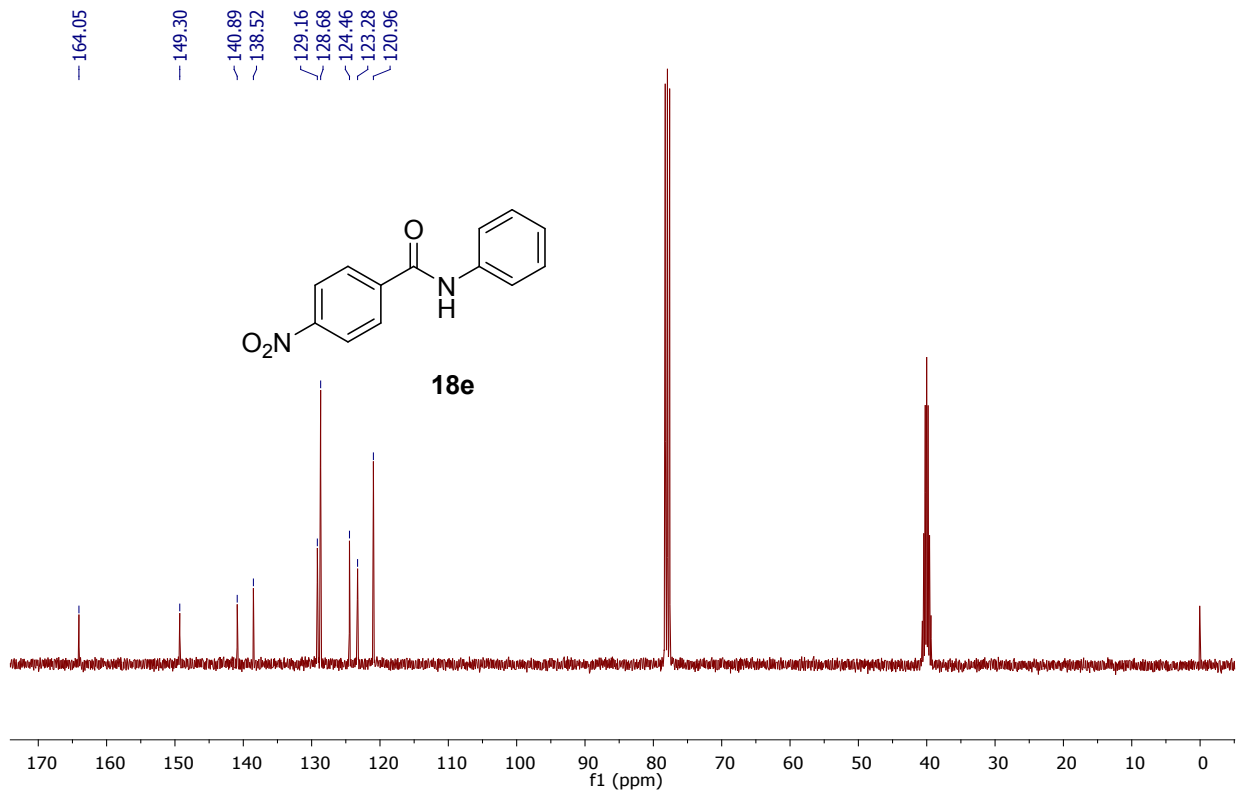



8.34  
8.31  
8.04  
8.01  
7.82  
7.53  
7.50  
7.21  
7.18

—2.36

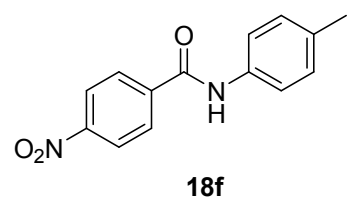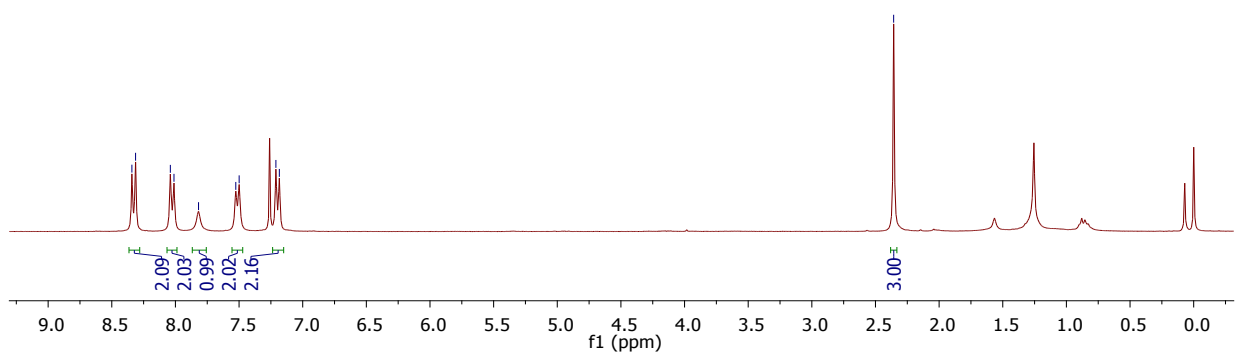

163.45  
149.71  
140.63  
135.15  
134.63  
129.76  
128.23  
124.01  
120.48

—20.95

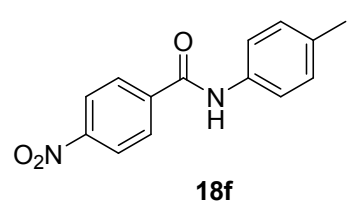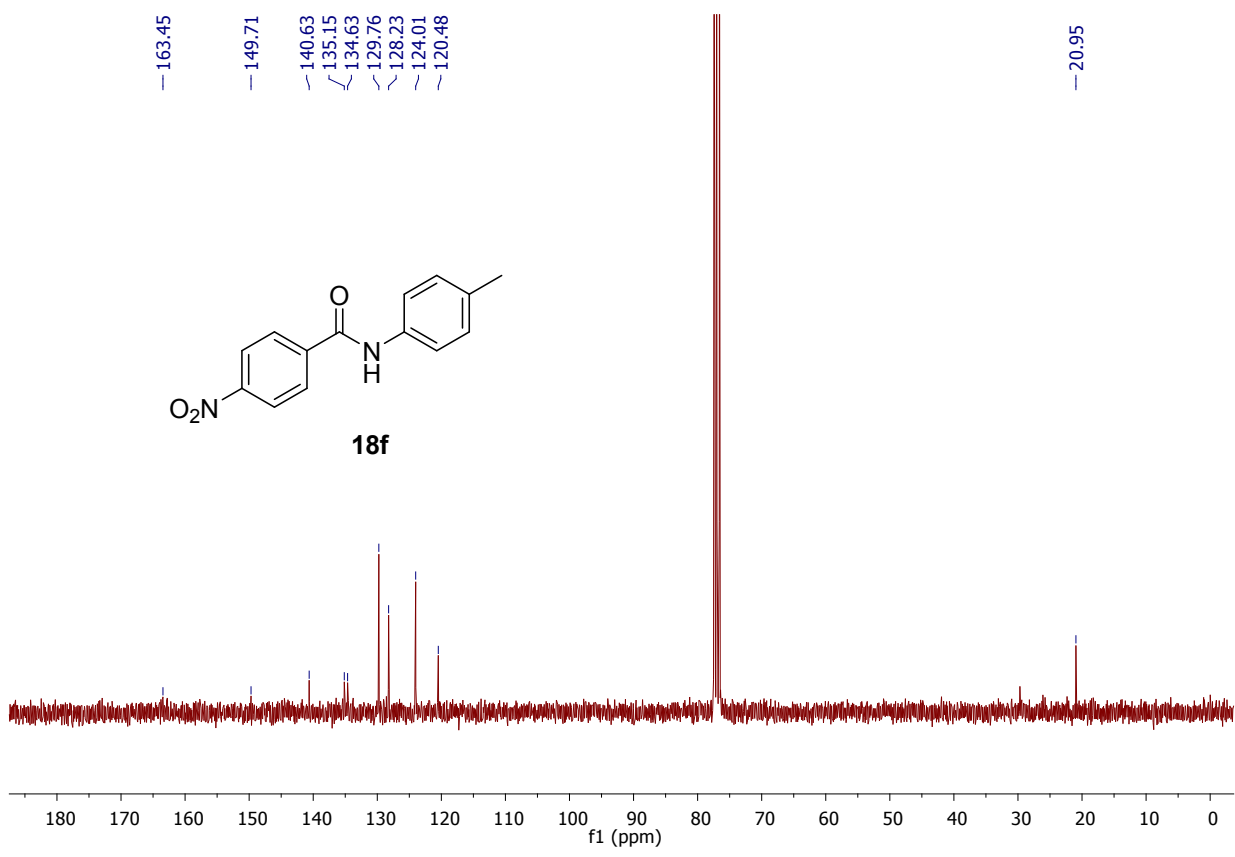

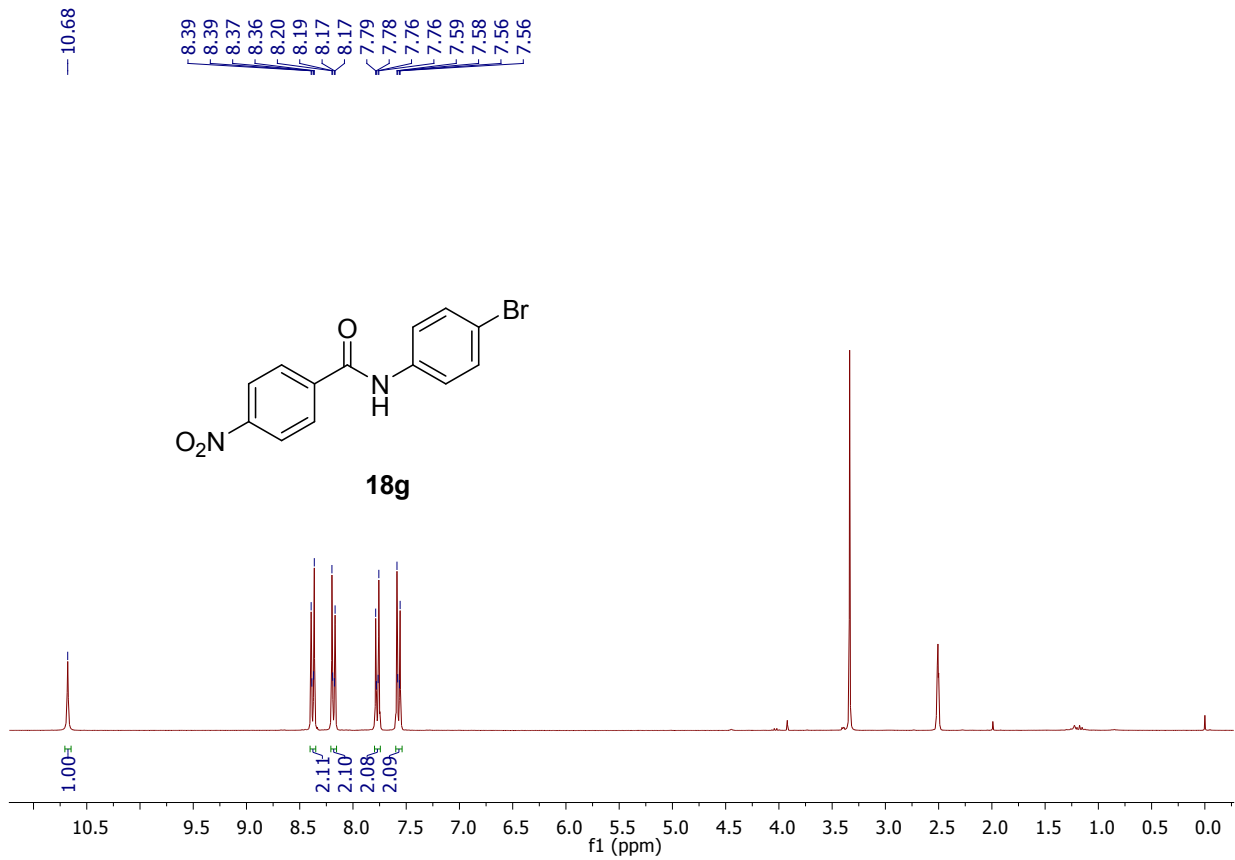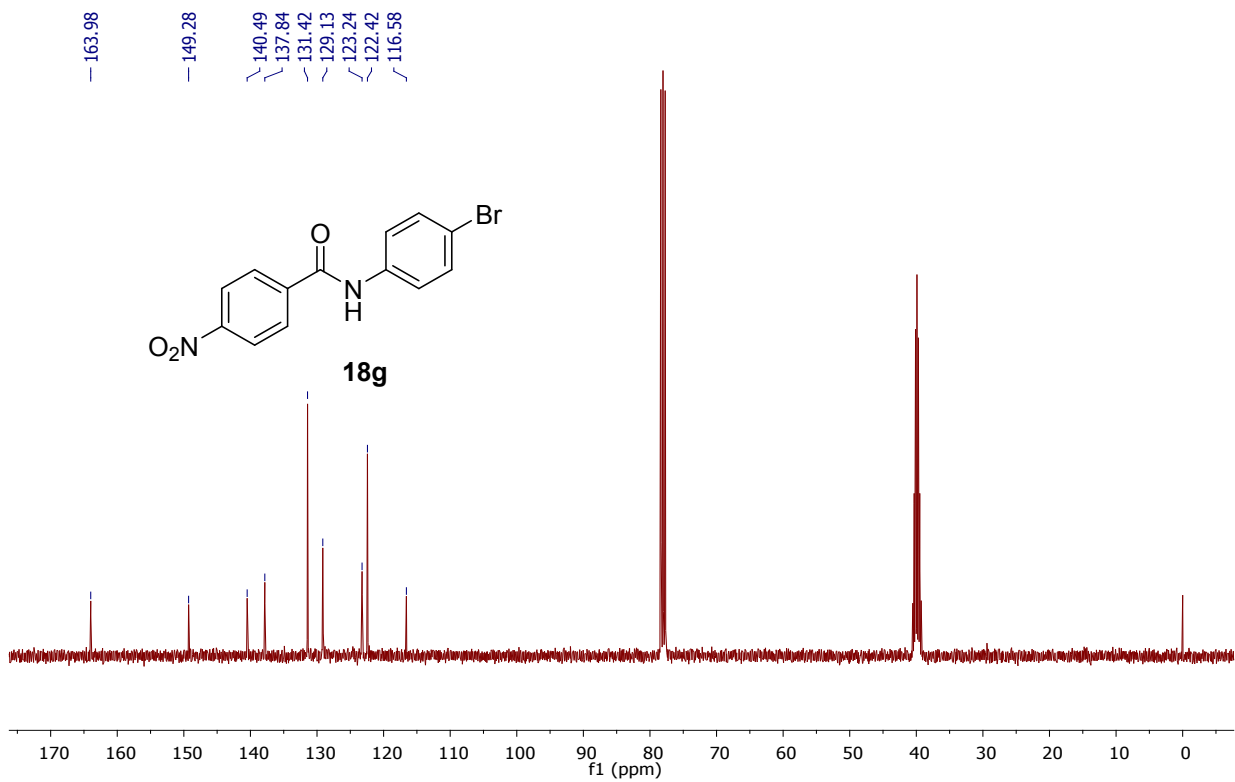

8.18  
8.15  
7.87  
7.84  
7.31  
7.27  
7.26  
7.23  
- 6.62  
4.57  
4.55

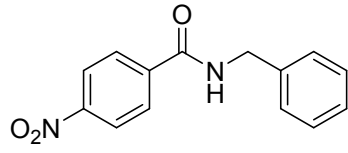

18h

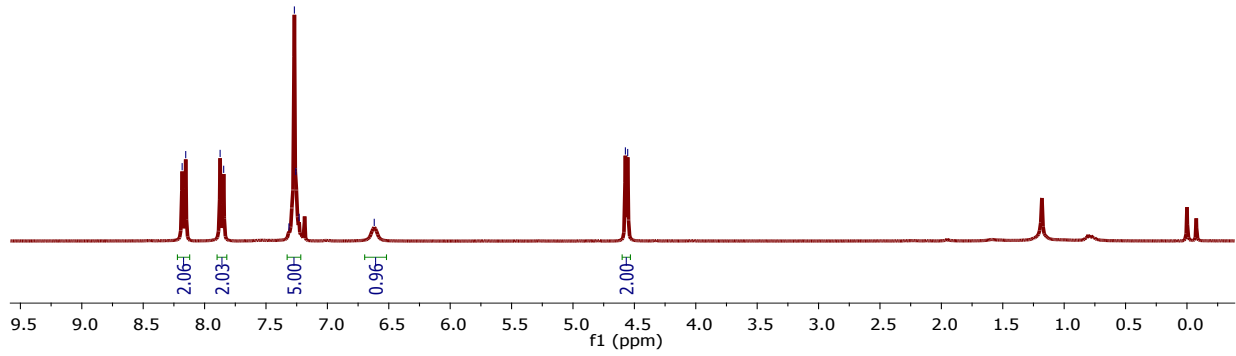

165.37  
149.61  
139.91  
137.46  
128.93  
128.21  
127.96  
127.94  
123.82  
44.45

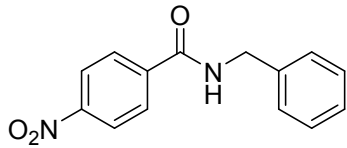

18h

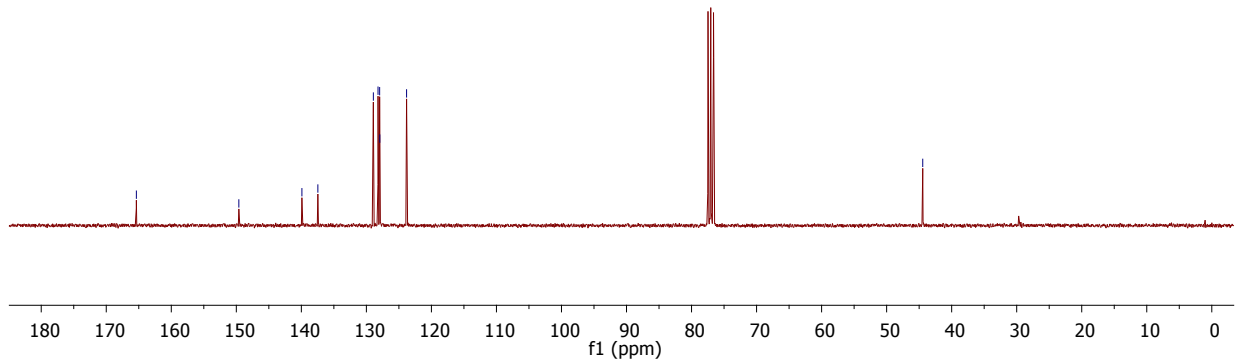

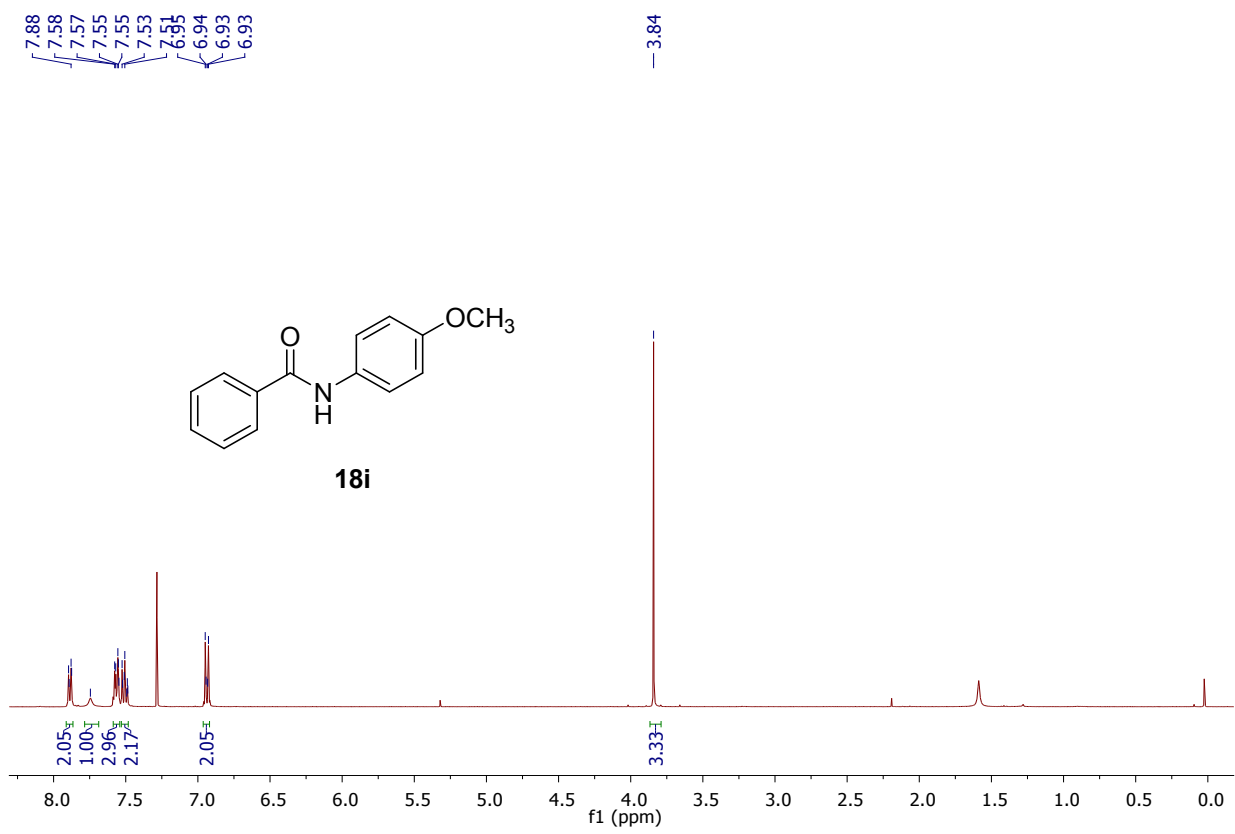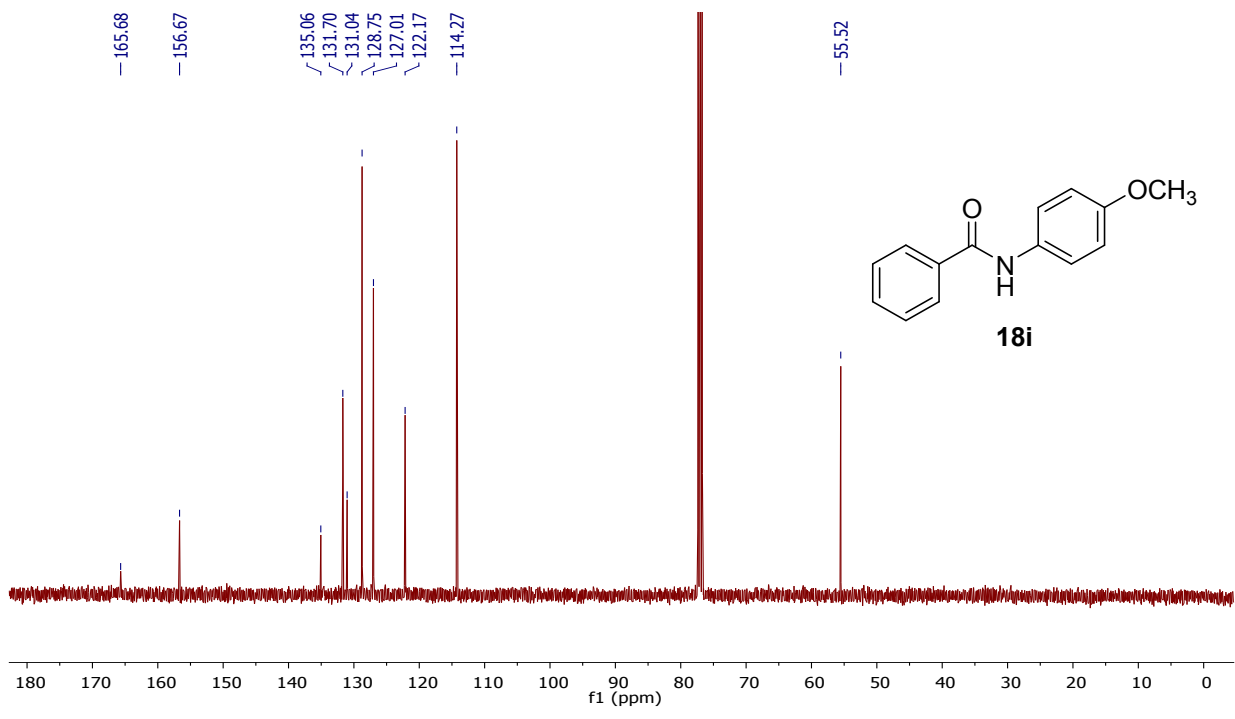

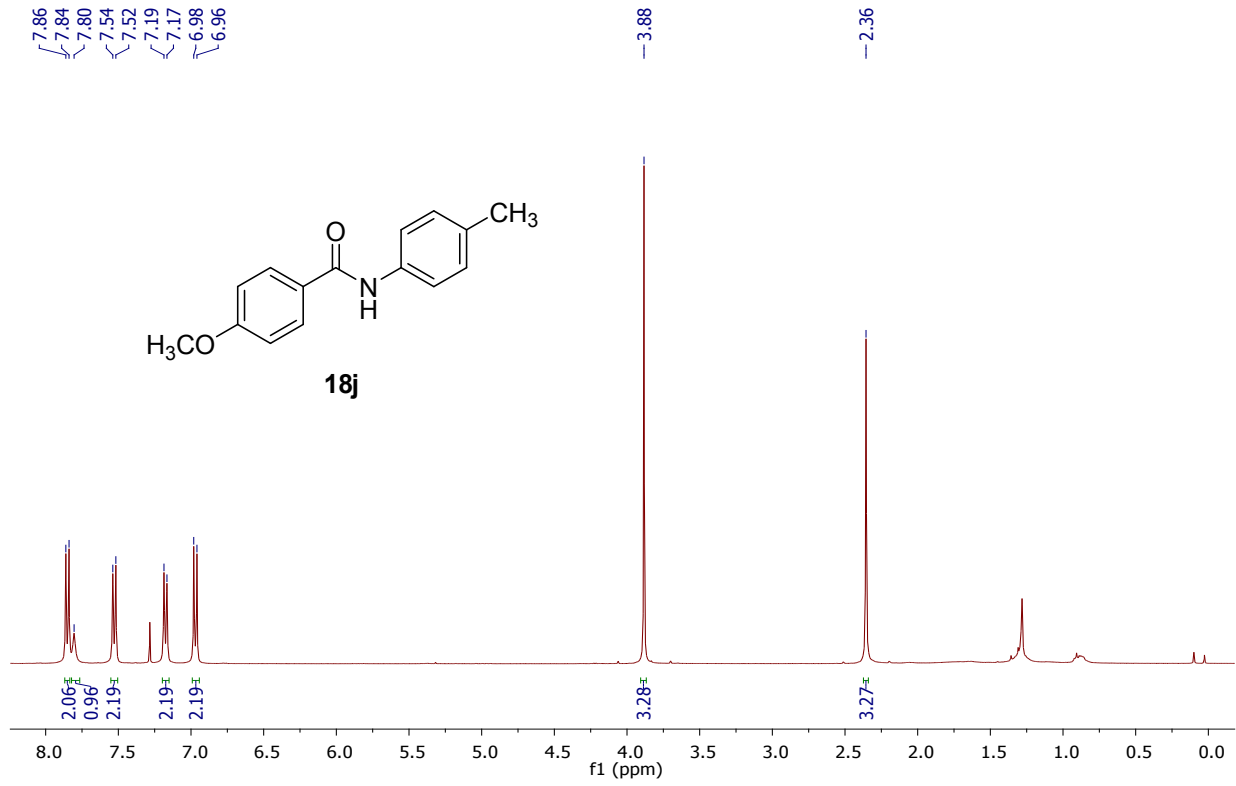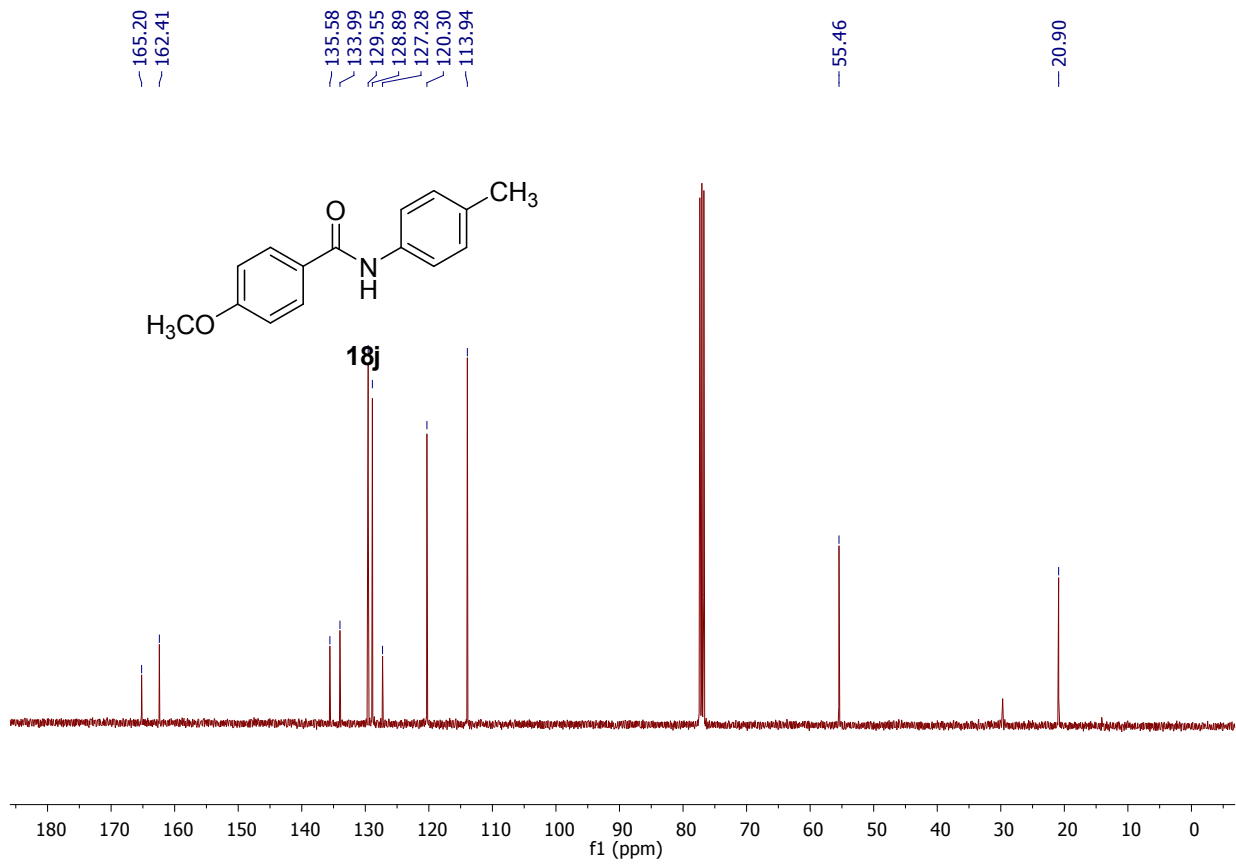

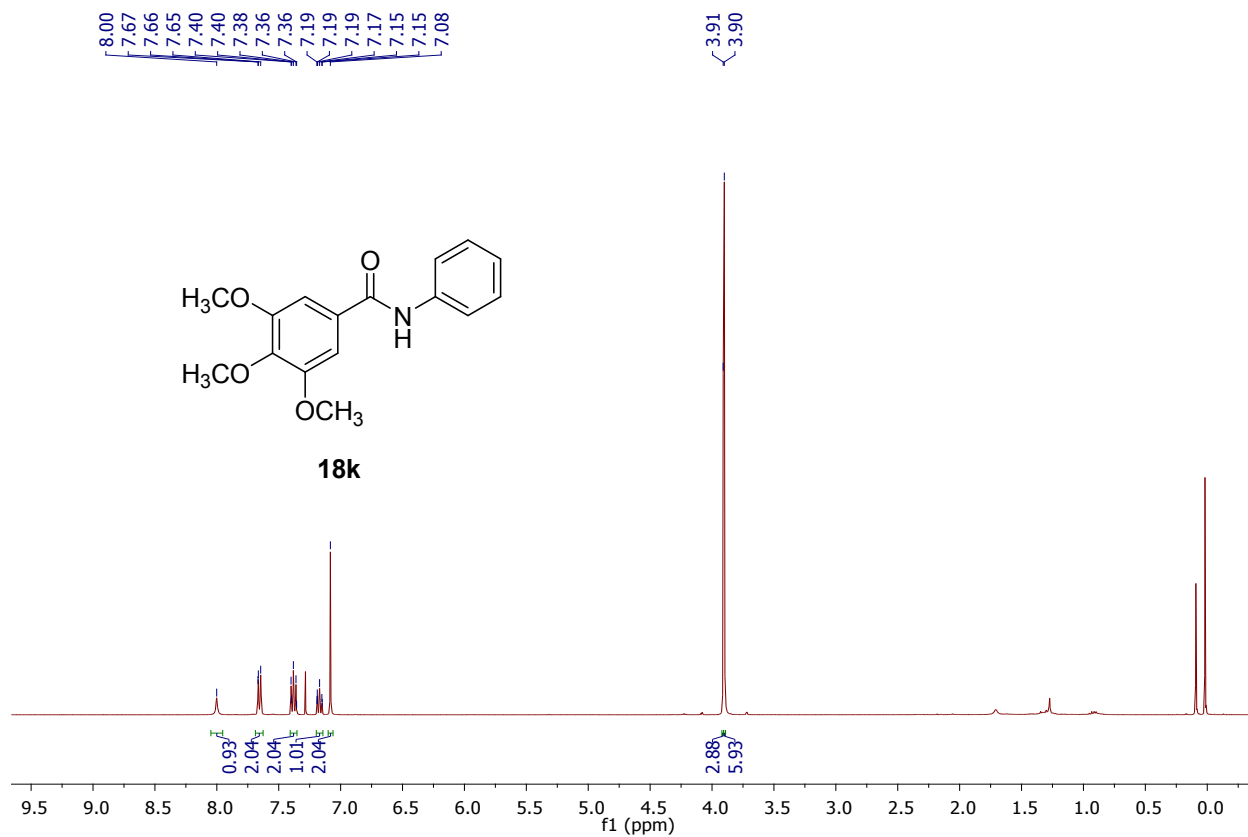

165.66, 153.32, 141.21, 137.93, 130.47, 129.10, 124.63, 120.31, 107.92, 104.54, 60.96, 56.37

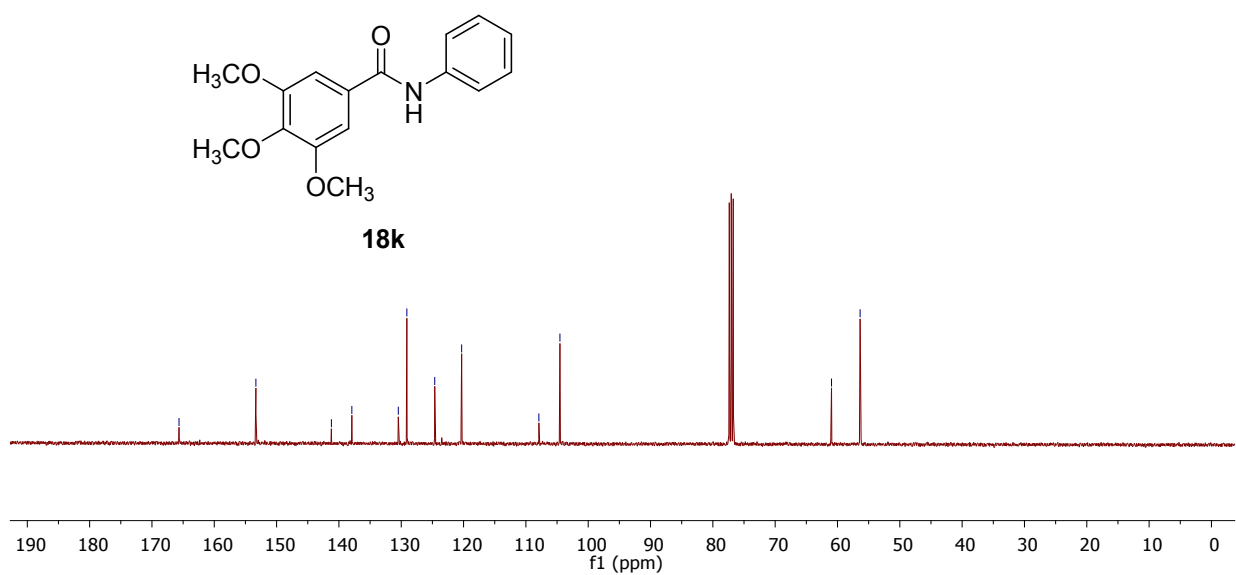

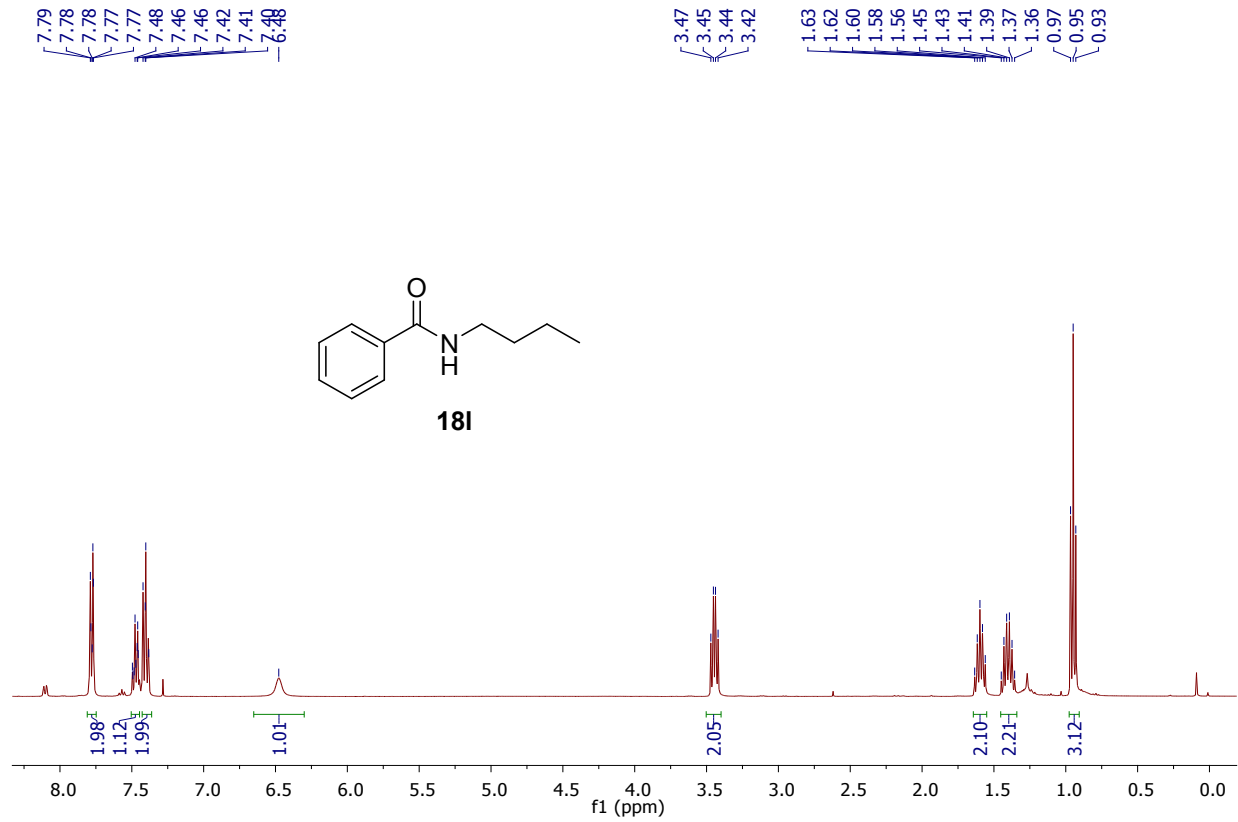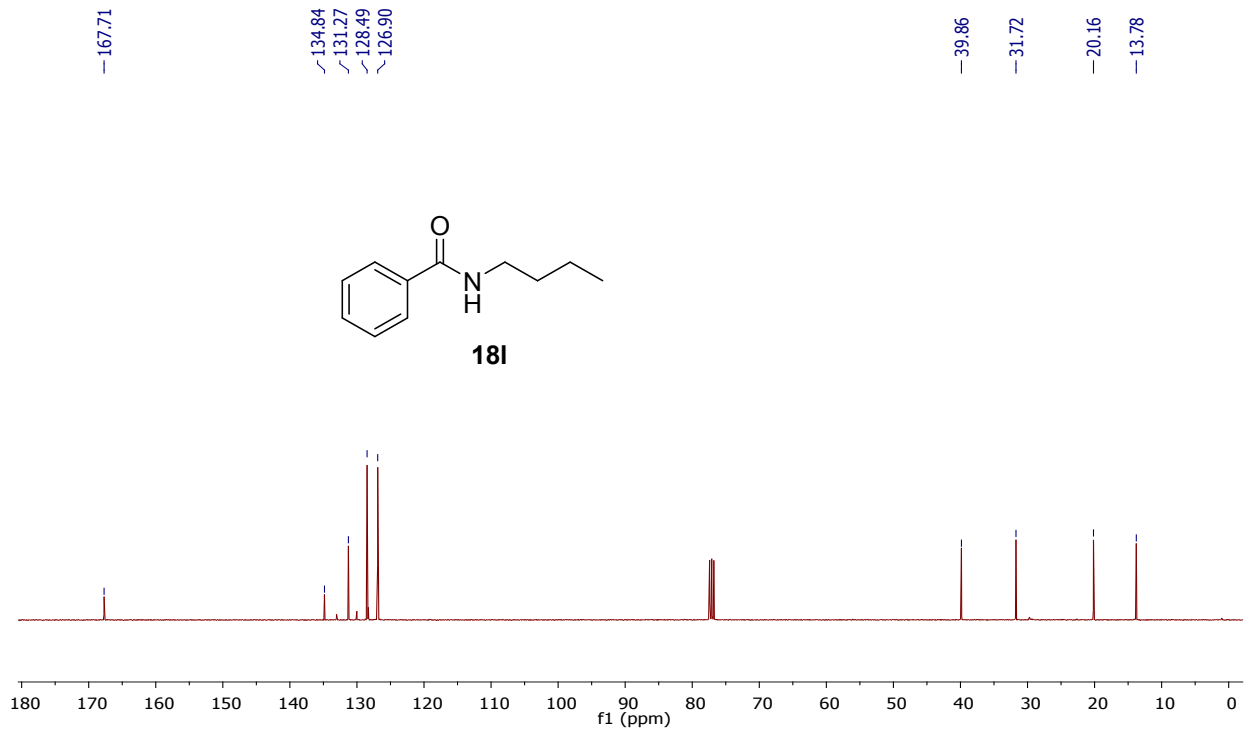

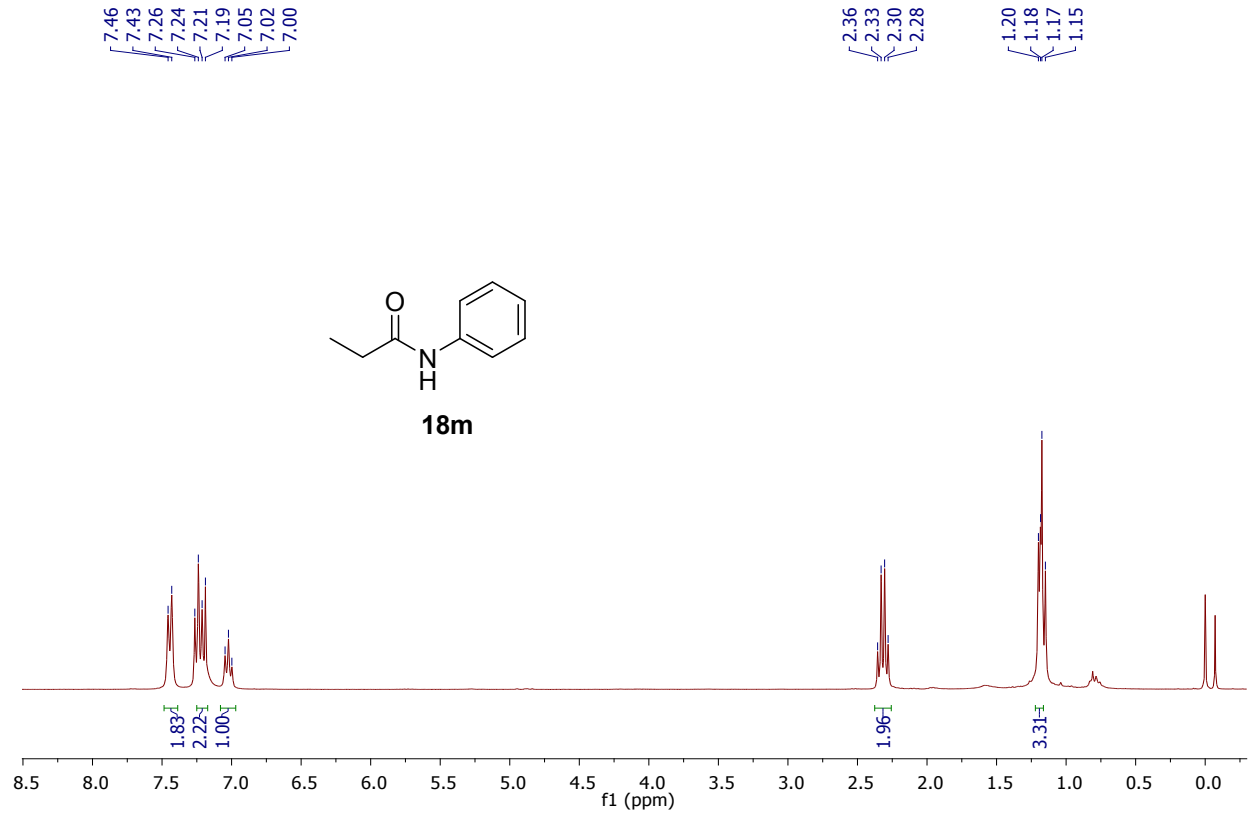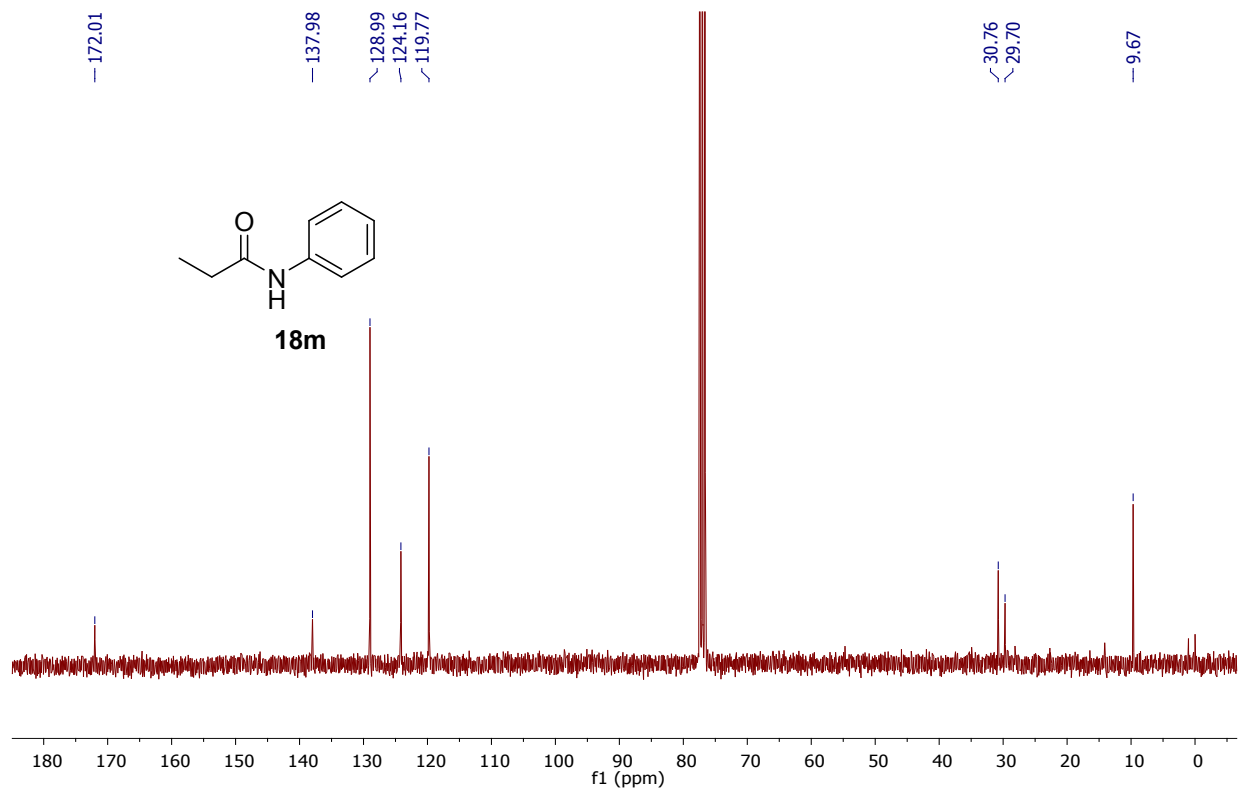



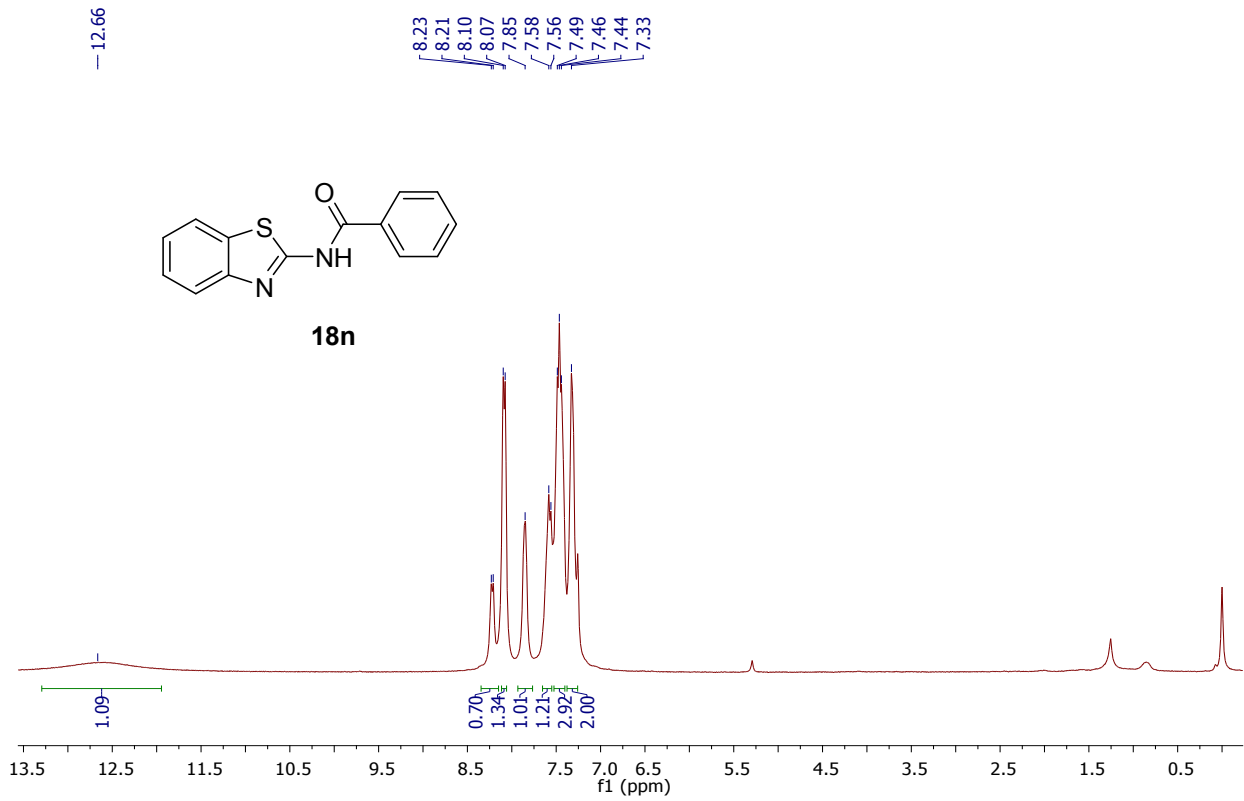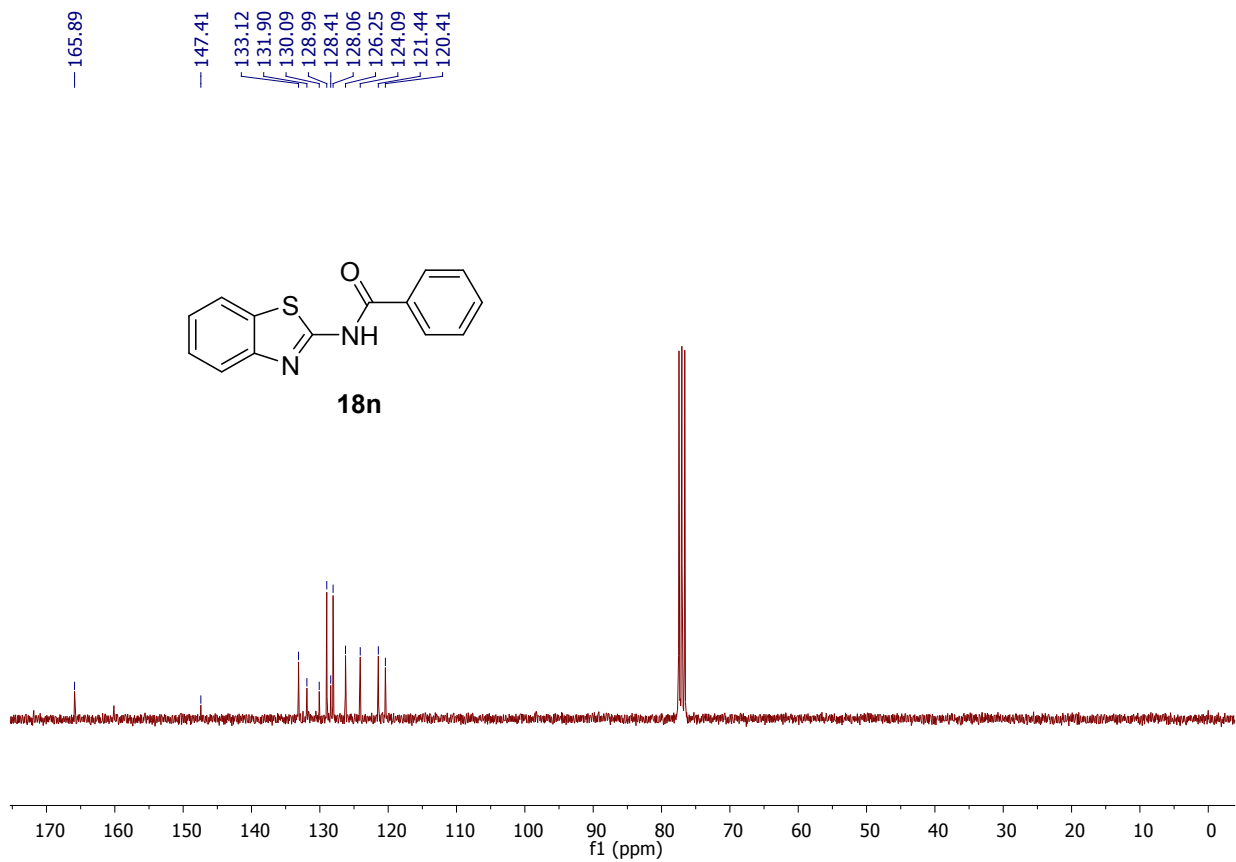

9.06  
8.91  
8.67  
8.18  
8.16  
7.64  
7.62  
7.35  
7.33  
7.31  
7.18  
7.16  
7.14

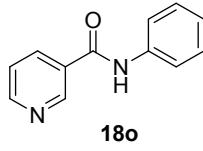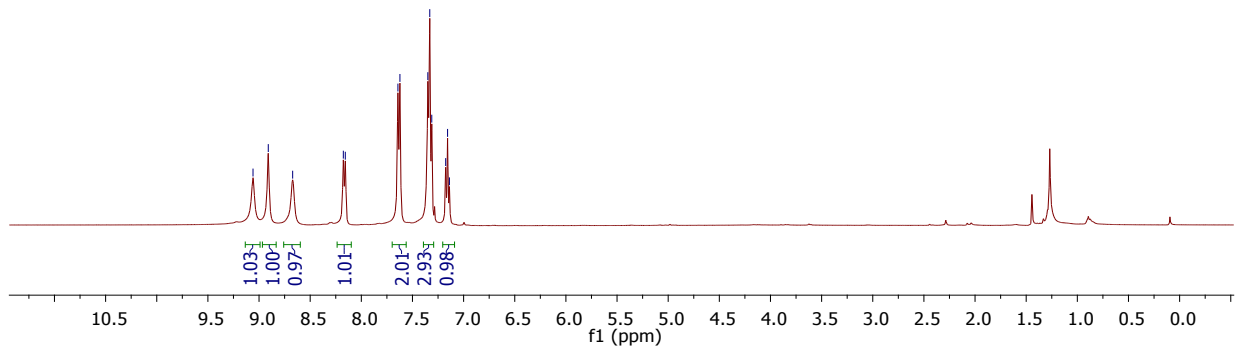

164.29  
152.11  
147.99  
137.65  
135.61  
130.99  
129.09  
125.05  
123.72  
120.78

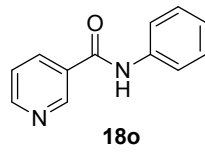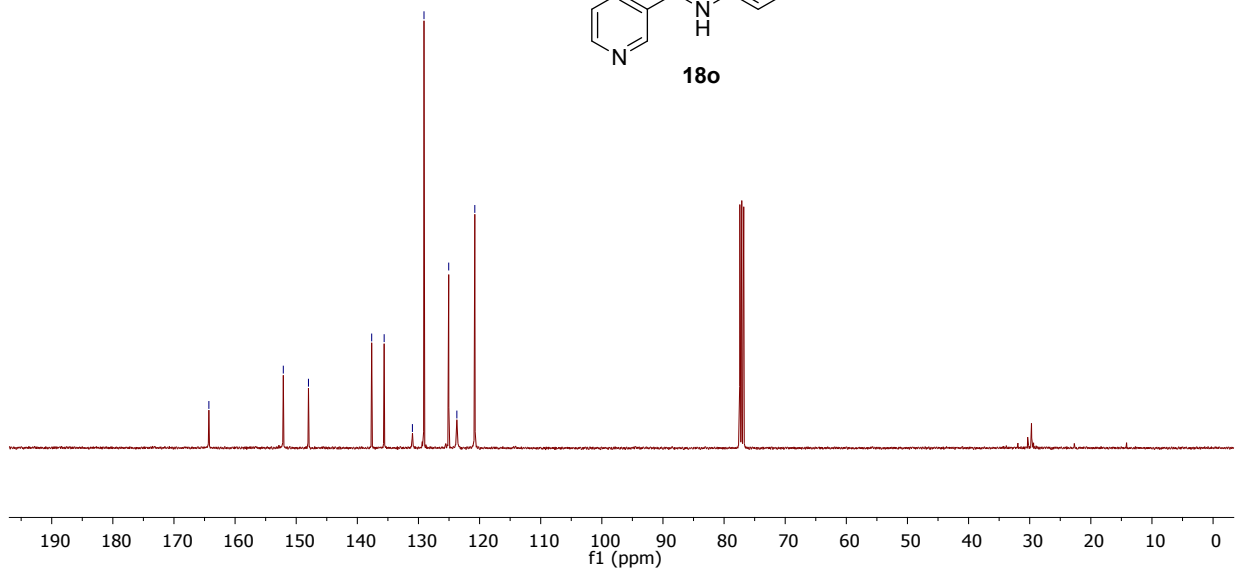

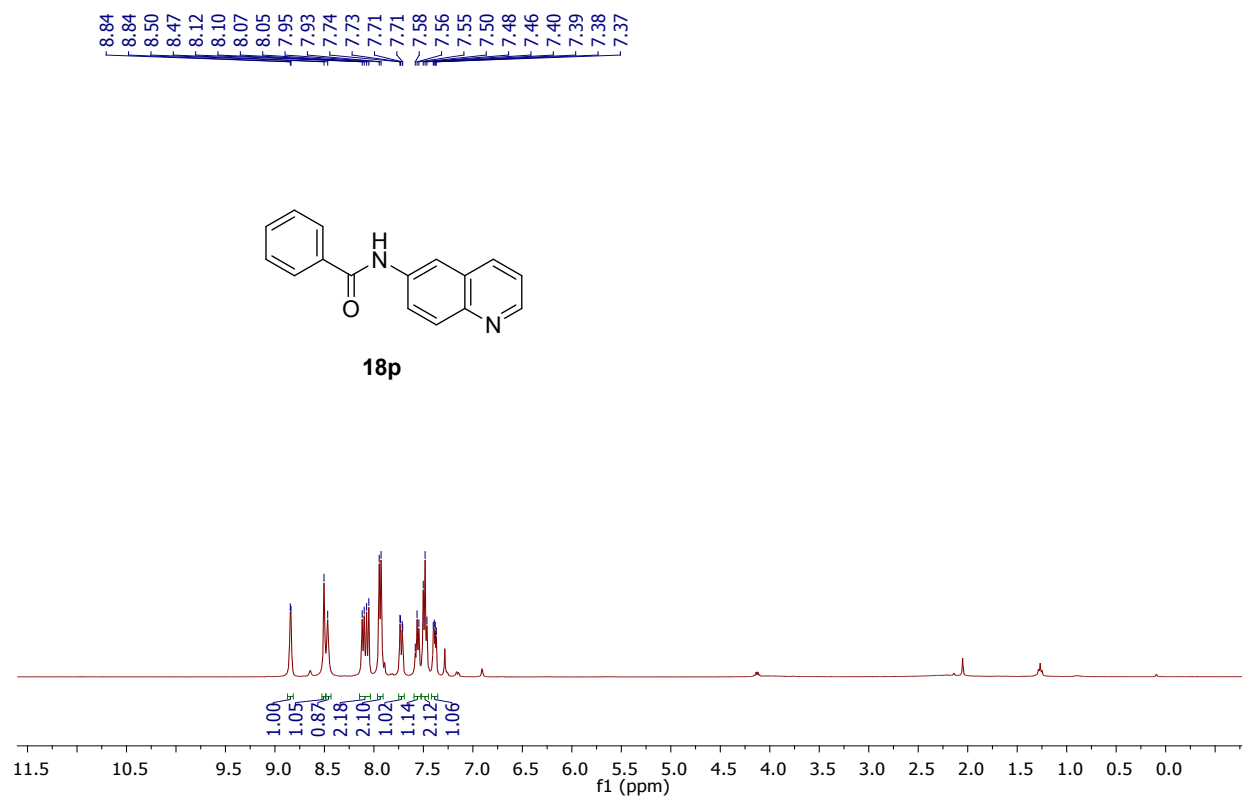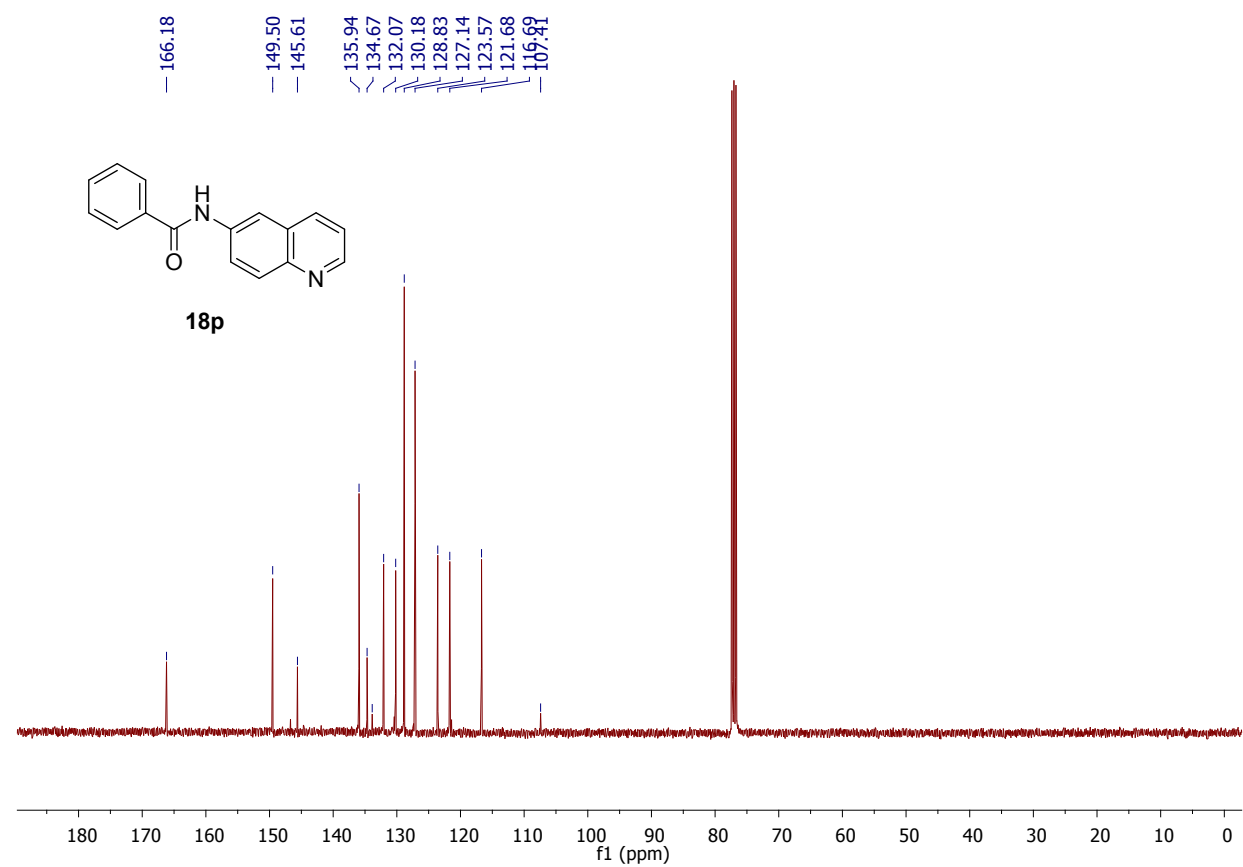

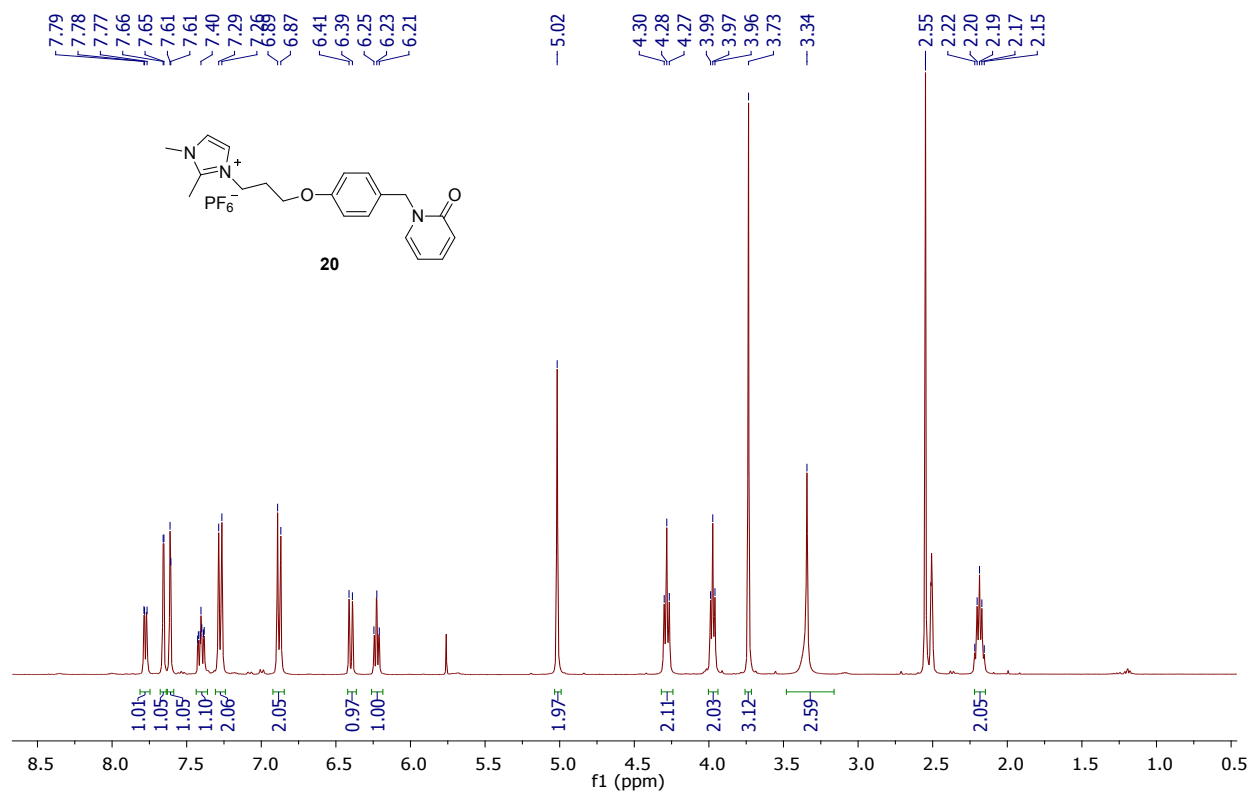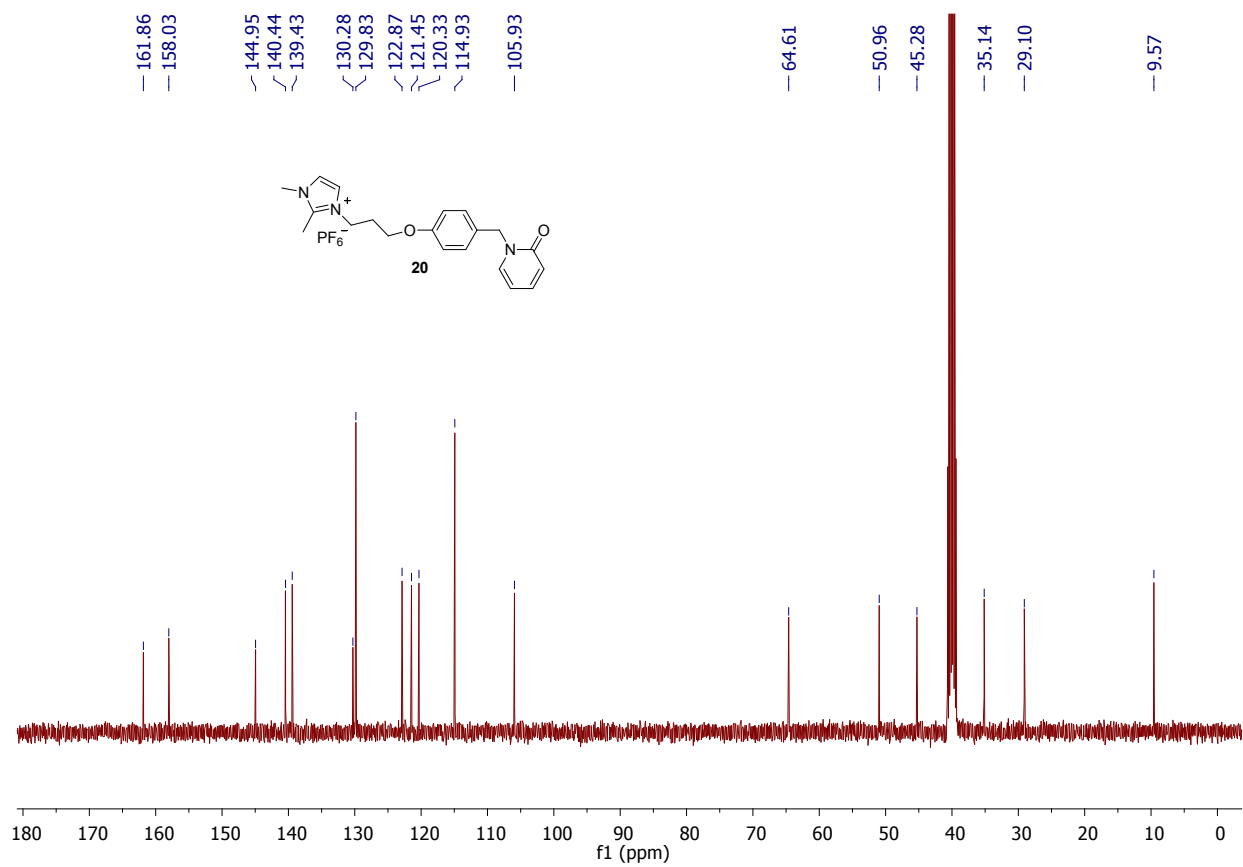

Supplement: c4ra14856h1.pdf [file c4ra14856h1.pdf]
